# The effect of Behavioral Factors and Intervention Strategies on Pathogen Transmission: Insights from a Two-Week Epidemic Game at Wenzhou-Kean University in China

Salihu S. Musa<sup>1,2,3,\*\*</sup>, Winnie Mkandawire<sup>1,4,\*\*</sup>, Trusting Inekwe<sup>1,5</sup>,  
Yinan Dong<sup>1</sup>, Andonaq Grozdani<sup>1</sup>, Hung Hong<sup>1</sup>, Mansi Khandpekar<sup>1</sup>,  
Sarah A. Nowak<sup>6</sup>, Jean-Gabriel Young<sup>7,8</sup>, Aloysius Wong<sup>9</sup>, Dale King<sup>9</sup>,  
Andrés Colubri<sup>1,4,\*</sup>

**1** Department of Genomics and Computational Biology, University of Massachusetts Chan Medical School,  
Worcester, Massachusetts, USA

**2** Department of Mathematics, University of Maryland, College Park, MD, 20742, USA

**3** Institute for Health Computing, University of Maryland, North Bethesda, Maryland, 20852, USA

**4** Broad Institute of MIT and Harvard, Cambridge, Massachusetts, USA

**5** Department of Computer Science, Worcester Polytechnic Institute, Worcester, Massachusetts, USA

**6** Department of Pathology and Laboratory Medicine, Larner College of Medicine, University of Vermont,  
Burlington, Vermont, USA

**7** Department of Mathematics and Statistics, University of Vermont, Burlington, Vermont, USA

**8** Vermont Complex Systems Center, University of Vermont,  
Burlington, Vermont, USA

**9** Biology Department, Wenzhou-Kean University, Wenzhou, Zhejiang, China

\* Correspondence to: [Andres.Colubri@umassmed.edu](mailto:Andres.Colubri@umassmed.edu) (AC)

\*\* Co-first authors: [ssmusa@umd.edu](mailto:ssmusa@umd.edu) (SSM) & [Mkandawire.Winnie@umassmed.edu](mailto:Mkandawire.Winnie@umassmed.edu) (WM)

December 20, 2024

## Authors' email

SSM: [ssmusa@umd.edu](mailto:ssmusa@umd.edu);

WM: [winnie.mkandawire@umassmed.edu](mailto:winnie.mkandawire@umassmed.edu);

TI: [toinekwe@wpi.edu](mailto:toinekwe@wpi.edu);

YD: [yinan.dong1@umassmed.edu](mailto:yinan.dong1@umassmed.edu);

AG: [andonaq.grozdani@umassmed.edu](mailto:andonaq.grozdani@umassmed.edu);

HH: [hung.hong2@umassmed.edu](mailto:hung.hong2@umassmed.edu);  
MK: [mansi.khandpekar1@umassmed.edu](mailto:mansi.khandpekar1@umassmed.edu);  
SAN: [sarah.nowak@med.uvm.edu](mailto:sarah.nowak@med.uvm.edu);  
JGY: [jean-gabriel.young@uvm.edu](mailto:jean-gabriel.young@uvm.edu);  
AW: [alwong@kean.edu](mailto:alwong@kean.edu);  
DK: [daking@kean.edu](mailto:daking@kean.edu);  
AC: [Andres.Colubri@umassmed.edu](mailto:Andres.Colubri@umassmed.edu).

## Abstract

**Background:** Effective control of infectious diseases relies heavily on understanding transmission dynamics and implementing interventions that reduce the spread. Non-pharmaceutical interventions (NPIs), such as mask-wearing, social distancing, and quarantining, are vital tools in managing outbreaks where vaccines or treatments are limited. However, the success of NPIs is influenced by human behavior, including compliance with guidelines, and attitudes such as beliefs about the effectiveness of interventions. In this study, we applied an innovative proximity-based experimentation platform to generate empirical data on behaviors and attitudes and their effect on disease transmission. Our platform uses a smartphone application that enables the spread of a digital pathogen among participants via Bluetooth during open-world "experimental epidemic games". This creates an environment for epidemiology field experimentation where researchers can control transmission mechanics and collect full ground-truth datasets.

**Methods:** Our study employed the "epidemic" app to investigate the impact of risk perception and compliance to NPIs on pathogen transmission. Involving nearly 1,000 participants in a two-weeks long epidemic game at Wenzhou-Kean University (WKU) in China, the app generated a multimodal dataset, which allowed us to develop and parameterize Susceptible-Exposed-Infected-Recovered (SEIR) models. We quantified the extent by which behavioral factors, such as risk perception and compliance with quarantine, and strength of intervention strategies influence disease transmission. The model incorporates time-varying transmission rates that reflect changes in attitudes and behavior, and we calibrated it using the empirical data from the epidemic game to provide critical insights into how variations in NPI compliance levels affect outbreak control.

**Findings:** The findings reveal that adherence to NPIs alone, which is influenced by changes in behavior and attitudes, may not result in the expected reduction in transmission, illustrating the complex interplay between behavioral factors and epidemic control. Moreover, the model further shows that changes in risk perception coupled with NPI adherence could significantly reduce infection levels as well as susceptibility.

**Interpretation:** Our study highlights the usefulness of experimental epidemic games to generate realistic datasets, and the importance of integrating behavioral dynamics into epidemiological models to enhance the accuracy of predictions and the effectiveness of public health interventions during infectious disease outbreaks.

*Keywords:* Experimental Game, Epidemiological Modeling, Reproduction Number, Human Behavior, Behavioral attitude, Non-pharmaceutical Intervention.

## 34 **Research in Context**

### 35 **Evidence before this study**

36 We conducted a comprehensive review of the existing literature to evaluate the current state of  
37 knowledge regarding empirically-informed infectious disease modeling, with a particular focus on the  
38 role of human behavior and non-pharmaceutical interventions (NPIs) in mitigating disease transmis-  
39 sion. Our search spanned databases such as PubMed, MEDLINE, and Web of Science, targeting pub-  
40 lications up to March 1, 2024, using keywords including “infectious disease modeling,” “simulation,”  
41 “experimental game,” “human behavior,” “non-pharmaceutical interventions,” and “epidemiology.”  
42 While a substantial body of research explores the influence of human behavior on disease dynamics,  
43 there is a notable gap in studies that integrate large-scale mobility and behavioral data collected  
44 with smartphone apps within open-world environments, such as a university campus. Most existing  
45 studies fail to incorporate the complexity of real-time human behavioral responses and NPIs, which  
46 are crucial for accurately modeling the dynamics of disease transmission in such contexts.

### 47 **Added value of this study**

48 This study is the first to use our proximity-based experimentation platform to conduct an epi-  
49 demic game in a large-scale university setting while integrating human behavioral factors and NPIs  
50 into a mechanistic modeling framework. By employing a flexible, time-varying transmission rate  
51 model, our research highlights the impact of human behavior and NPIs on pathogen spread dynam-  
52 ics. This novel approach provides a more accurate and nuanced depiction of real-world transmission  
53 scenarios, as observed during the proximity-based experiment. Through the integration of empirical  
54 data from nearly 1,000 participants, combined with detailed model simulations and rigorous sen-  
55 sitivity analyses, we offer insights into how timely and coordinated interventions, alongside public  
56 compliance, can significantly influence the trajectory of an outbreak. This study underscores the  
57 necessity of adaptive strategies in outbreak management and presents a robust framework that can  
58 inform and enhance future public health planning and response efforts.

### 59 **Implications of all the available evidence**

60 Our findings underscore the pivotal role of experimental and computational approaches for  
61 generating realistic outbreak datasets and integrating behavioral dynamics and NPIs into epidemi-  
62 ological models. This results in significantly more accurate models that then can become valuable  
63 tools for public health planning. The study provides a solid foundation for refining models with  
64 additional complexities, such as age-based behaviors, and offers a framework for optimizing outbreak  
65 management and future pandemic preparedness.

## 66 1 Introduction

67 The advent of new digital technologies has significantly transformed infectious disease research,  
68 including both epidemiological data collection and modeling. In particular, mobile applications  
69 (apps) can leverage the sensing and communication capabilities of smartphones and wearable devices  
70 for generating large amounts of real-time data at multiple levels. During the COVID-19 pandemic,  
71 apps were used for participatory surveillance, population-level tracking, individual risk assessment,  
72 individual screening, digital contact tracing, and education [1]. Several years before the pandemic, we  
73 started working on a proximity-based app called Operation Outbreak (OO) that facilitates immersive  
74 engagement in "mock" outbreaks that take place in real-life settings, such as schools and conferences,  
75 enhancing our understanding of outbreak dynamics and response strategies thanks to its capacity  
76 to incorporate naturalistic human behavior and controlled transmission mechanics [2, 3]. The OO  
77 mobile application is freely accessible on Google and Apple app stores [4, 5], and it is supported by a  
78 scalable cloud backend and web-based administration and analytics tools. This app enables a digital  
79 infection that spreads through participants' mobile phones via Bluetooth, triggering a "synthetic"  
80 outbreak that participants can respond realistically to by endowing the app with appropriate reward  
81 or incentive mechanisms to various participants' actions. The early example of the "Corrupted Blood  
82 incident" virtual pandemic in the World of Warcraft massive multiplayer online role playing game  
83 (MMORPG) back in 2007 prompted epidemiologists [6] to consider MMORPGs and other virtual  
84 games as settings where individual human behavior in response to pathogen spread could be studied  
85 experimentally rather than via modeling assumptions, issues of external validity notwithstanding  
86 [7]. The OO app was initially motivated by infectious disease education and pandemic preparedness,  
87 as the original version of the app was designed to support an immersive educational experience in  
88 middle and high schools centered around public health, outbreak response, and societal roles during  
89 health emergencies [8]. While this continues to be one of the main thrusts of the project [12], here  
90 we used a customized version of the OO app and backend to more specifically target epidemiology  
91 experimentation and research [18], by generating valuable data that informs epidemiological models  
92 and providing insights into pathogen transmission dynamics [19, 20, 21, 22].

93 In this study, we conducted a proximity-based "experimental epidemic game" at the cam-  
94 pus of Wenzhou-Kean University (WKU), an international Chinese-American institution of higher-  
95 education established by Kean University of New Jersey in the Zhejiang province of eastern China  
96 [9], which we will call the WKU game (or experiment) for short for the remainder of the paper.  
97 The aims of the WKU game were to generate a comprehensive outbreak dataset, explore spread of  
98 the simulated pathogen, and assess behavioral responses within the naturalistic environment of a  
99 college campus given a ground-truth transmission model in the app. Planning began in early fall  
100 2023, with strategic recruitment of WKU students as organizers and facilitators. Our primary ob-  
101 jectives were to engage at least 1,000 students over a two-week observational period and to integrate  
102 features representing individual behavioral actions within the experimentation framework. Drawing  
103 on methodologies from past (proximity-based) epidemic games at institutions like Colorado Mesa  
104 University and Brigham-Young University [3], we reached high participation rates (nearly a quarter  
105 of the enrolled students) through a comprehensive campus information campaign and incentivization  
106 strategies. In preparation for this experiment, we advanced the underlying technology in the app,  
107 including the incorporation of the open-source Herald proximity library [10] and migration to the

Flutter framework [11], enhancing the app’s compatibility, adaptability and scalability [3].

Epidemiological modeling, when integrated with human behavior, serves as a foundational tool for evaluating the impact of non-pharmaceutical interventions (NPIs) on disease dynamics [3, 19, 21, 24]. The WKU proximity-based epidemic game combined open-world data with an epidemiological framework to study pathogen spread within a largely closed population. This interdisciplinary approach aims to contribute valuable insights into epidemiological modeling and public health preparedness, focusing on behavioral responses and the effectiveness of interventions in containing and mitigating disease outbreaks [3, 20, 23, 25]. Researchers have used online behavioral experiments to try to measure and model the effect of individuals’ preferences and decisions on adoption of protective measures and disease dynamics [26, 27, 28]; however, such experiments often reduce complex human behavior to simple abstract decisions that may not resonate with participants’ real-world concerns or priorities and may fail to reflect the complex social contexts and disease exposure patterns that influence behavior in realistic environments. Our approach has the advantage of providing an open-world experimentation framework with high degree of mechanistic realism for the transmission processes and a naturalistic environment able to capture inter-individual variation in real-world social settings [18]. The idea of conducting real-world ”simulations” or experiments to study disease transmission has been explored before by projects like FluPhone [13] in 2010, and more recently, SafeBlues [14]. Both used Bluetooth sensing in mobile phones to spread virtual pathogens through a network of participants, but thanks to advances in mobile technology over the last decade, we were able to construct a new platform with a significantly greater potential for customization and scale than any earlier projects we are aware of.

Numerous studies have examined the impact of NPIs on pathogen transmission, providing critical insights into how measures such as social distancing, mask-wearing, and isolation can alter the course of an epidemic [29, 30]. For instance, SIRS models have demonstrated that the attributes of a pathogen, particularly its basic reproduction number ( $R_0$ ), significantly influence the long-term epidemiological outcomes of transmission reduction efforts [31, 32]. Pathogens with high  $R_0$  values may exhibit only temporary reductions in transmission rates, with minimal impact on the epidemic’s overall dynamics [41]. Additionally, other studies have highlighted the importance of seasonality and immunity in shaping medium- to long-term epidemic dynamics. These studies suggest that intermittent application of NPIs may lead to delayed but potentially larger secondary transmission peaks, underscoring the complexity of public health responses. The interaction between NPIs and pathogen characteristics necessitates ongoing evaluation and adjustment of intervention strategies to effectively address unexpected outcomes [32, 33, 34, 35].

Incorporating behavioral factors into epidemiological models significantly enhances our understanding of disease dynamics by elucidating the complex interplay between human behavior and pathogen transmission [30, 36]. Traditional models often overlook the variability in human behavior, treating responses to outbreaks as static or uniform. However, this approach does not fully account for the adaptive nature of individual and collective actions in response to evolving risk perceptions and public health interventions. Our study tries to address these challenges by integrating behavior as a dynamic variable, where individuals adjust their adherence to NPIs based on the perceived severity of the outbreak and their personal risk assessment (that is influenced by real-time factors such as disease prevalence, peer influence, and the effectiveness of public health communication) [30, 36]. Using the dataset generated from the WKU game, our model not only captures the immediate impact

151 of NPIs such as social distancing and mask-wearing but also considers the feedback loops between  
152 behavioral adaptations and disease dynamics [37, 38]. This approach provides a more realistic and  
153 nuanced understanding of pathogen transmission, reflecting the complex interplay between human  
154 actions and epidemiological outcomes [36, 37]. While our model advances the field by incorporating  
155 these dynamic behavioral factors, we acknowledge the ongoing challenge of fully capturing the spec-  
156 trum of human behavior, which underscores the need for continuous refinement and development in  
157 this area of research [39, 40].

158 Our modeling framework integrates these insights by utilizing data-driven approaches to sim-  
159 ulate pathogen transmission and assess the impact of various interventions, such as quarantine,  
160 isolation, and face masks [24]. By leveraging mobile app technology, our platform allows for a de-  
161 tailed examination of how individual decisions—such as mask wearing, social distancing, or isolating  
162 when symptomatic—affect transmission dynamics within the controlled environment of the game, in  
163 turn embedded in the open-world setting of a college campus. The models were calibrated using data  
164 from the WKU game, enabling a precise analysis of transmission dynamics and the effectiveness of  
165 different interventions. This approach not only enhances our understanding of disease dynamics but  
166 also underscores the importance of timely interventions and compliance with preventive measures in  
167 mitigating outbreaks.

168 This study focuses on establishing a foundation for comprehensive models that can guide public  
169 health policies and strategies to prevent and reduce infectious disease outbreaks. The data gener-  
170 ated from the WKU game was analyzed using a conceptual epidemiological modeling approach that  
171 integrates human attitudes, behaviors, and NPIs to disentangle and quantify the impact of these  
172 factors on pathogen spread. By fitting the model to the empirical data from our experimental game,  
173 we validated its accuracy and identified key parameters driving transmission dynamics. Sensitivity  
174 analyses and contour plots further highlight the importance of timely interventions, demonstrating  
175 how individual behavior and NPIs can significantly reduce infection rates. This research not only  
176 advances our theoretical understanding of socio-epidemiological interactions but also offers practical  
177 guidance for managing infectious diseases across diverse settings.

178 The paper is organized as follows: Section 2 describes the compartmental model we employed  
179 to mathematically represent disease transmission during the WKU game, which includes a variable  
180 transmission rate to capture adaptive behavioral factors and strength of NPIs. This section also  
181 calibrates the model with data from the two-week long WKU game. Section 3 provides an examina-  
182 tion of the model that focuses on the occurrence and stability of disease-free and endemic equilibria,  
183 as well as the possibility of other complex dynamics. Results on the impact of behavior and NPIs  
184 are also presented in this section. Section 4 includes global uncertainty and parameter sensitivity  
185 analyses to evaluate the model’s robustness and identify critical parameters influencing transmission  
186 dynamics. Section 5 presents the results of numerical simulations and insights gained from global  
187 parameter sensitivity studies. Finally, Section 6 summarizes the study’s findings and discusses the  
188 implications for public health strategies and future research paths.



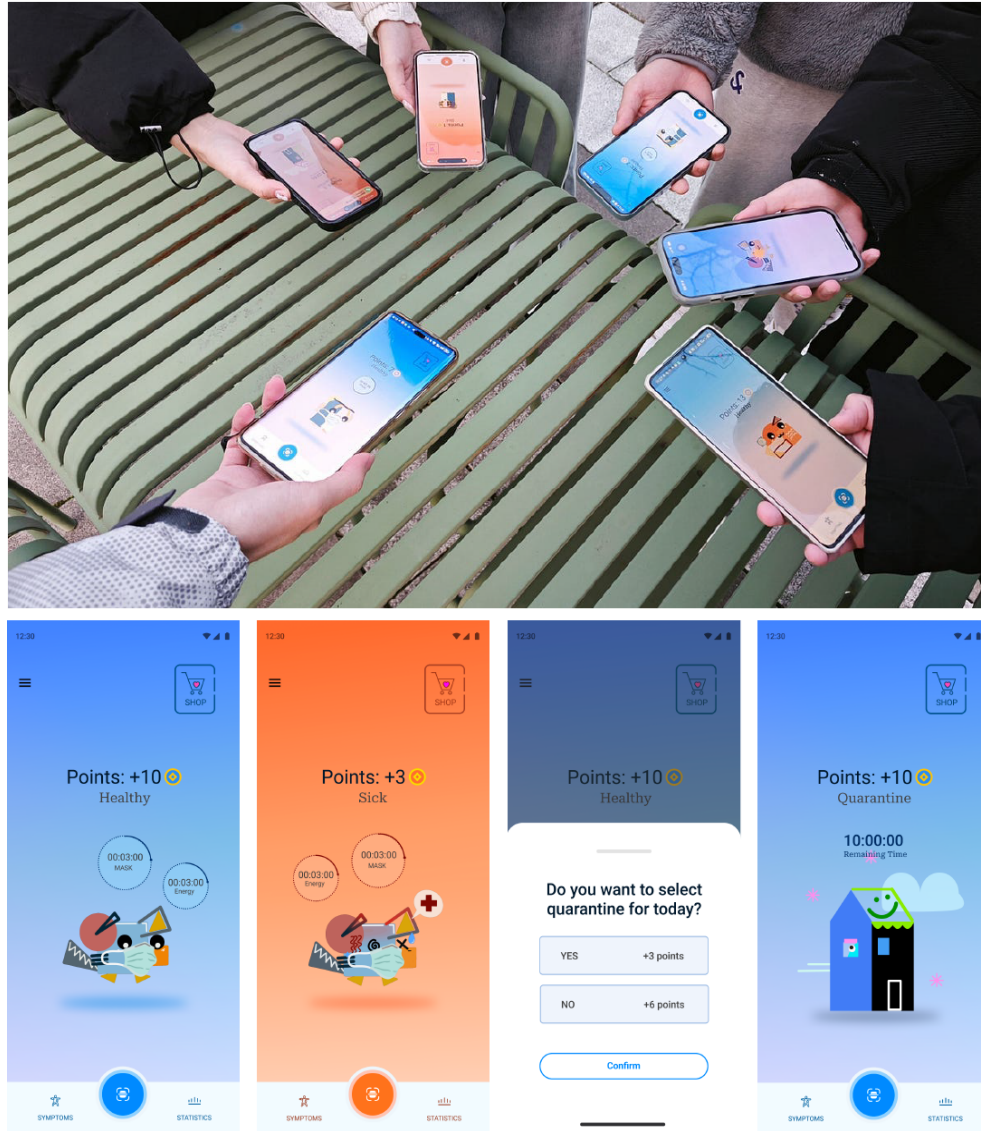

**Figure 1:** Students engaging with the smartphone app simulating pathogen transmission and disease progression during the epidemic game at Wenzhou-Kean University (WKU) (top). Screenshots of the app, showing (from left to right) the home page with healthy and sick avatars, a pop-up message prompting students to choose whether to quarantine/isolate for the day, and the home page interface while in quarantine/isolation (bottom). These visuals illustrate the interactive features of the app, which are integral to collecting behavioral and epidemiological data during the WKU game.



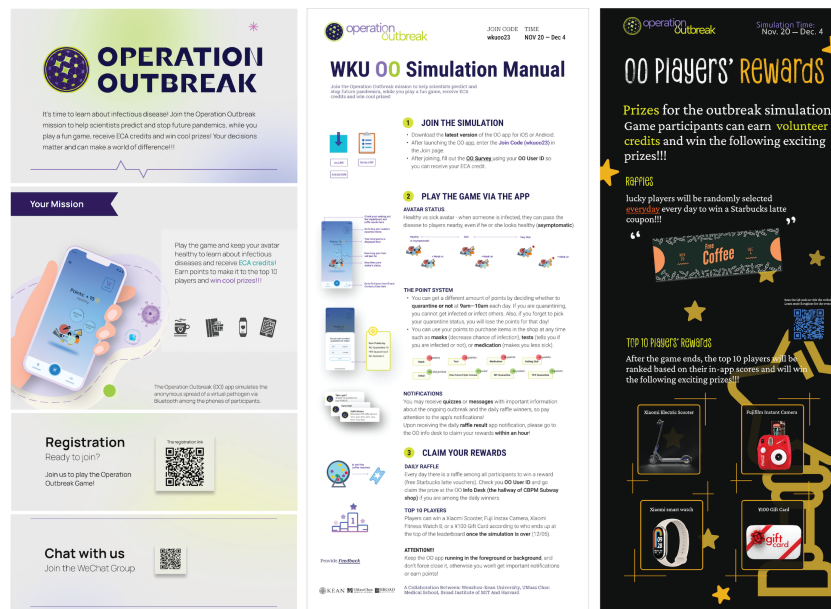

**Figure 2:** Materials used to promote the experimental epidemic game at WKU and facilitate student enrollment into the activity. Section of an informational micro-site about WKU game with links to the registration form and WeChat group (left). Manual page detailing the use of the app and the features specific to the WKU game (center), and flier describing the final prizes to be awarded to top-scoring students (right).

## 2 Methods

### 2.1 Experimental design

We designed the WKU experimental epidemic game to study human behavior and NPIs during an infectious disease outbreak. Experimental games constitute a novel approach that has been applied in fields such as public health and climate science and it is gaining recognition as a valuable source of behavioral data for research [16, 17, 15]. The app spreads the digital pathogen using an underlying "ground-truth" transmission model that assigns a probability of infection to each proximity contact between a susceptible and an infectious user (refer to the appendix for details) and informs users of their simulated health status (asymptomatic, mild and severely ill, recovered, and deceased) via an animated avatar and changes in the color of the app's user interface (UI). A key difference with prior experimental games is the open-world, naturalistic setting of our experiment, which allows for a highly immersive experience and enables students to adopt behaviors during our experiment such as socially distancing to reduce their chances of infection, very closely mirroring real-life.

Furthermore, we considered how to gamify health-related decision-making in the app in such a way that students would need to make choices in the experiment on a regular basis, mirroring conflict between individual and group benefits, just like in a real outbreak. Based on these considerations, we implemented a point-based system in which students could collect points by deciding to 'quarantine / isolate' or not at the beginning of each day and then use those points to purchase virtual masks and rapid diagnostic kits through a 'shop' feature within the app. Of course, it would not have been

208 reasonable to ask students to quarantine/isolate by physically restricting their movement, instead,  
209 they quarantined/isolated by selecting a button in the app, which made their avatars invisible to  
210 nearby participants (both quarantine and isolation used the same mechanics, the difference in using  
211 one term of the other refers to whether the student was in an asymptomatic state or not at the  
212 moment of their selection.) The goal of the point system was to provide a quick mechanism for  
213 students to get points without distracting them from their daily school activities, but still offering a  
214 sense of personal investment in the experiment, as their points informed a school-wide leaderboard  
215 that was used to award prizes to the top-scoring students once the experiment ended. See Fig. 1  
216 for pictures of the students using the app and some screen captures depicting its main screen and  
217 quarantine/isolate feature.

218 We also planned and implemented a pre-experiment stage to engage a substantial portion of  
219 the student body, employing a multifaceted strategy across various communication platforms (see  
220 Fig. 2). This strategy included the design of a dedicated informational website, the formation of  
221 WeChat groups for seamless communication, and the distribution of both digital and physical flyers  
222 to effectively disseminate information. A pivotal component of this strategy was the use of a registra-  
223 tion form managed by the local organization team, allowing for the systematic collection of student  
224 details and facilitating insights into participation trends through regular updates. Integration with  
225 WeChat further enhanced communication channels, enabling efficient handling of inquiries and fos-  
226 tering active engagement among participants; this approach to data collection has proven effective  
227 [42, 43, 44]. Moreover, incentives such as extra-curricular credits and a point-based system within  
228 the app were implemented with the aim of incentivize sustained involvement and fostered a com-  
229 petitive environment through the school-wide leaderboard and post-game rewards. Thanks to this  
230 comprehensive approach, over 1,000 students (a quarter of WKU’s enrollment in 2023) responded  
231 to be interested in the WKU game. As expected, a fraction of those students dropped eventually,  
232 resulting in  $N_{total} = 794$  students participating in the WKU game. A separate manuscript currently  
233 in preparation delves into the methodological aspects of the WKU field behavioral experiment, pro-  
234 viding in-depth details on how it was planned, promoted, and carried out by a team of WKU students  
235 [45].

## 236 2.2 Statistical analysis

237 The data were, first of all, analyzed using a simple statistical approach to understand the  
238 patterns of the experiment’s dynamics. Fig. 3 (a) displays the average number of infections per  
239 hour, revealing specific times of day with heightened transmission activity. Fig. 3 (b) presents the  
240 daily total infections (brown line) along with a 7-day moving average (purple line), which smooths  
241 out short-term fluctuations to highlight longer-term trends. Fig. 3 (c) shows the estimated effective  
242 reproduction number ( $R_{eff}$ ), with gray points representing the estimated values, error bars indicating  
243 the 95% confidence intervals, and a smoothed trend black line, offering insights into the transmission  
244 potential over time. The red dashed line at  $R_{eff} = 1$  serves as a critical threshold, indicating  
245 whether the infection is spreading (if  $R_{eff} > 1$ ) or declining (if  $R_{eff} < 1$ ). We used the serial interval  
246 information for COVID-19 from China as a proxy for the serial interval of the app-based outbreak,  
247 properly scaled to account for the two-week duration of the experiment [46]. These data provide  
248 view of infection dynamics, peak transmission periods, and the impact of interventions on outbreak

249 control.

250 Even though network epidemiology is not the methodological approach we followed in this  
251 manuscript, we conducted some basic statistical analyses on the contact network and transmission  
252 tree that resulted from the WKU game. First of all, these analyses revealed that a fraction of the  
253 participants (198) did not seemingly make any contacts with anybody else. Upon closer examination,  
254 we discovered that most of those participants were using a brand of Android smartphones that was  
255 not compatible with the Bluetooth library in the app. Therefore, we removed those 198 participants,  
256 and further removed 122 participants who had interacted for less than 5 minutes in total during the  
257 14 days of the WKU game and 2 participants who formed an isolated dyad. We used the remaining  
258  $N_{network} = 472 = 794 - 198 - 122 - 2$  in all subsequent network analyses (see Fig A4). We applied  
259 Taube et al. [47] methodology that characterizes the superspreader epidemiology in the transmission  
260 tree of any real outbreak by calculating two tree statistics, the proportion of cases causing super  
261 spreading events and the dispersion parameter. In the case of the WKU data (Fig A4), we found  
262 that it closely mirrors patterns seen in outbreaks from biological pathogens (refer to the Appendix  
263 for details). This result provides support for the external validity of the data from WKU game.

264 Survey responses captured basic demographics of the participating students, and their percep-  
265 tions of quarantine/isolation benefits and costs, adapted from H1N1 pandemic research [50]. Detailed  
266 daily counts of within-app quarantine, isolation, mask purchases, and rapid diagnostic test use pro-  
267 vided a detailed view of decision-making during the epidemic game. Note that only participants who  
268 downloaded the app and registered were included in the analysis, as the app tracked interactions  
269 solely among active participants.

270 The appendix provides a summary of the survey responses, which were not used in our present  
271 analyses, but we are planning to incorporate in follow-up work to this manuscript. This compre-  
272 hensive dataset is a valuable resource for epidemiological research, health policy evaluation, and  
273 public health, enhancing our understanding of outbreak dynamics and human behavioral responses  
274 [3, 48, 49, 51, 52], and it is available on a Zenodo public repository (see Declarations section for the  
275 repository URL.)

## 276 2.3 Conceptual model framework

277 We employed an SEIR (Susceptible-Exposed-Infectious-Recovered) model framework [53, 54] to  
278 investigate pathogen transmission dynamics within a controlled university environment, specifically  
279 WKU through the experimentation platform and the app; see full model in Fig. 4. Our model  
280 incorporates multiple transmission pathways, accounting for both asymptomatic and symptomatic  
281 exposure, and captures the quarantine/isolation statuses of individuals. The population is assumed  
282 to be constant in size and homogeneous in structure, assumptions that are justified given the two-  
283 week duration of the experiment during a class semester and the residential nature of the WKU  
284 campus. Beyond these simplifying assumptions, the model allows for variations in vulnerability and  
285 transmissibility, thus reflecting the complex and heterogeneous nature of real-world disease spread.

286 A key feature of our model is its integration of human behavior as a dynamic factor that  
287 influences transmission rates. We assume that during the experimental game, participants' adherence  
288 to NPIs—such as mask-wearing, social distancing, and isolation—is driven by their perception of  
289 infection risk, which evolves in response to changes in infection severity and prevalence within the

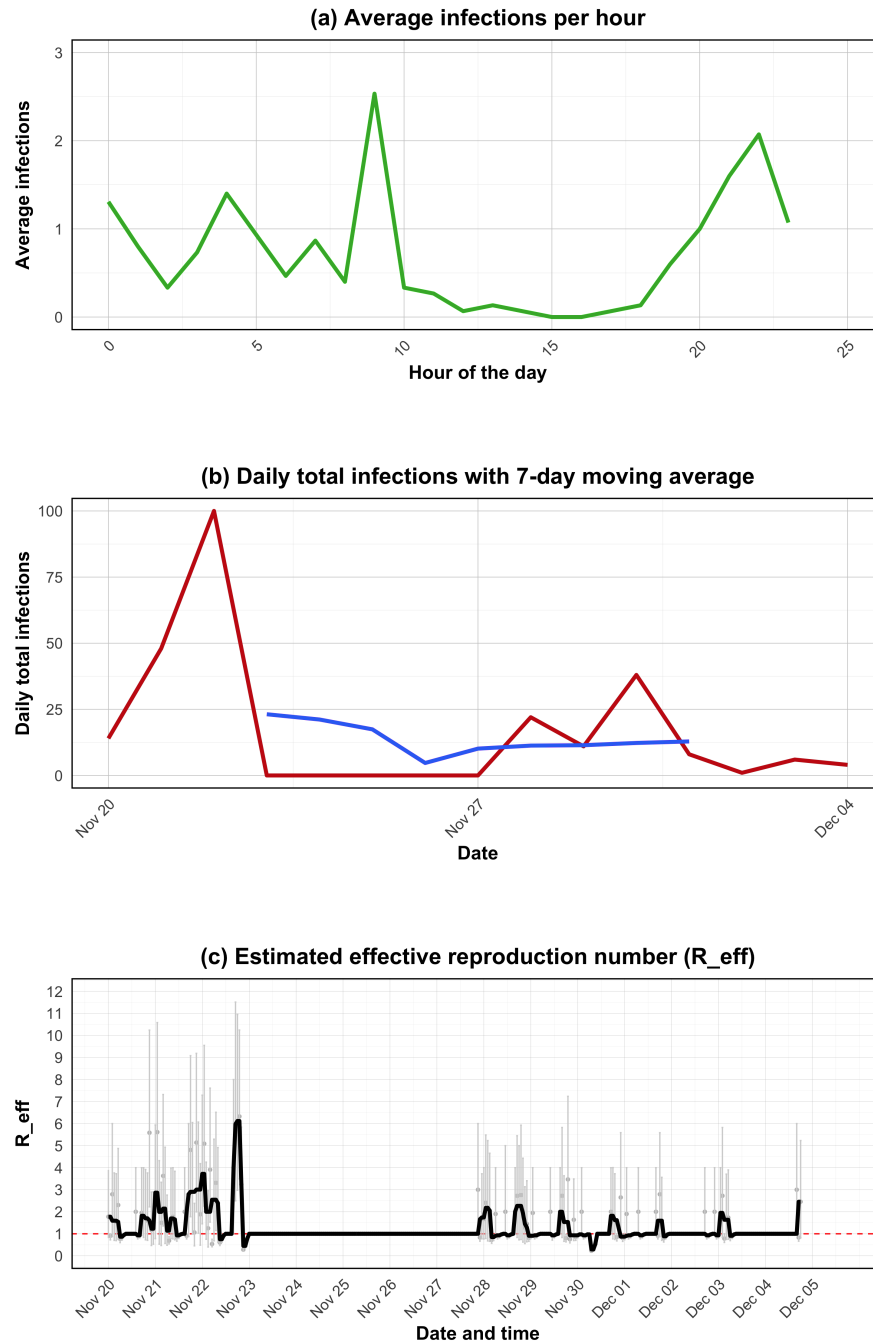

**Figure 3:** Extended time series analysis of infection dynamics during the WKU game (a) Hourly average number of infections, highlighting periods of heightened transmission activity throughout the day. (b) Daily total infections (red line) accompanied by a 7-day moving average (blue line) to smooth short-term fluctuations and reveal longer-term trends. (c) Estimated effective reproduction number ( $R_{eff}$ ), where gray points represent the estimated  $R_{eff}$  values, error bars denote the 95% confidence intervals, and the black line indicates the smoothed trend. The red dashed line at  $R_{eff} = 1$  marks the critical threshold, above which the infection is spreading and below which it is declining.

290 simulated environment. This feedback loop between behavior and transmission dynamics is crucial for  
291 accurately modeling the spread of infectious diseases in real-world scenarios where human decisions  
292 play a pivotal role. It is important to distinguish this post-experiment SEIR model with human  
293 behavior feedback from the model used by the app to drive the transmission during the experiment.  
294 We fit the parameters of the former using only the data gathered from the experiment, and we set  
295 the "ground-truth" parameters of the latter beforehand to ensure that the experimental game would  
296 take place within the desired time and case-count bounds.

297 Our app platform provides a unique experimental environment that generates rich datasets,  
298 including detailed records of contact tracing, participant behaviors, quarantine/isolation status, in-  
299 fection events, and (simulated) disease outcomes. By leveraging these data, we were able to construct  
300 a model to quantify the impact of various intervention strategies, such as contact tracing protocols,  
301 quarantine/isolation measures, and NPIs, on pathogen transmission. The model's flexibility allows  
302 us to represent different NPIs mathematically, capturing how these interventions collectively reduce  
303 transmission. Additionally, our framework considers the dynamic nature of behavior, where indi-  
304 viduals can alter their adherence to NPIs based on perceived risks and evolving conditions within  
305 the proximity-based experimental game. This approach provides a comprehensive tool for assessing  
306 the effectiveness of public health interventions and informs strategies for outbreak management and  
307 pandemic preparedness. The insights gained from integrating the experimental data into our SEIR  
308 model not only advance theoretical understanding but also offer practical guidance for controlling  
309 infectious disease outbreaks in educational settings and beyond.

## 310 **2.4 Model simplification**

311 We used a simulation-based inference framework for epidemiological dynamics to fit our model  
312 to the experimental data, as proposed by [59]. The analysis focuses on a specific scenario of model (1)  
313 within a closed domain (WKU campus). To streamline the model, we used coupling dynamics by  
314 combining quarantine/isolation and non-quarantine/non-isolation compartments due to their similar  
315 dynamic nature (except for the constant and flexible transmission rate) [83].

316 This simplification is justified by the analogous behavior of the full and sub-models, as well as the  
317 ability to capture human behavior and NPIs through a flexible transmission rate described in equation  
318 (1). Consequently, the simplified model retains the same incidence function and flexible transmission  
319 rate, with varying parameters  $P$  and  $C$  representing risk perception from participants and cumulative  
320 cases, respectively, which are key in changing the transmission behavior. This approach allows us  
321 to assess the influence of human behavior and intervention strategies on pathogen transmission  
322 during the WKU game. By analyzing data from the experiment, we can evaluate the effectiveness  
323 of different control measures and understand the role of human behavior and attitudes in mitigating  
324 outbreaks. Furthermore, numerical assessments and sensitivity analyses of the model's parameters  
325 provide insights into the robustness of our findings and model assumptions. Therefore, the simplified  
326 version of the model (depicted in Fig. A6), which maintains the same incidence function as in the  
327 full-model, while using flexible transmission rate, is given by:

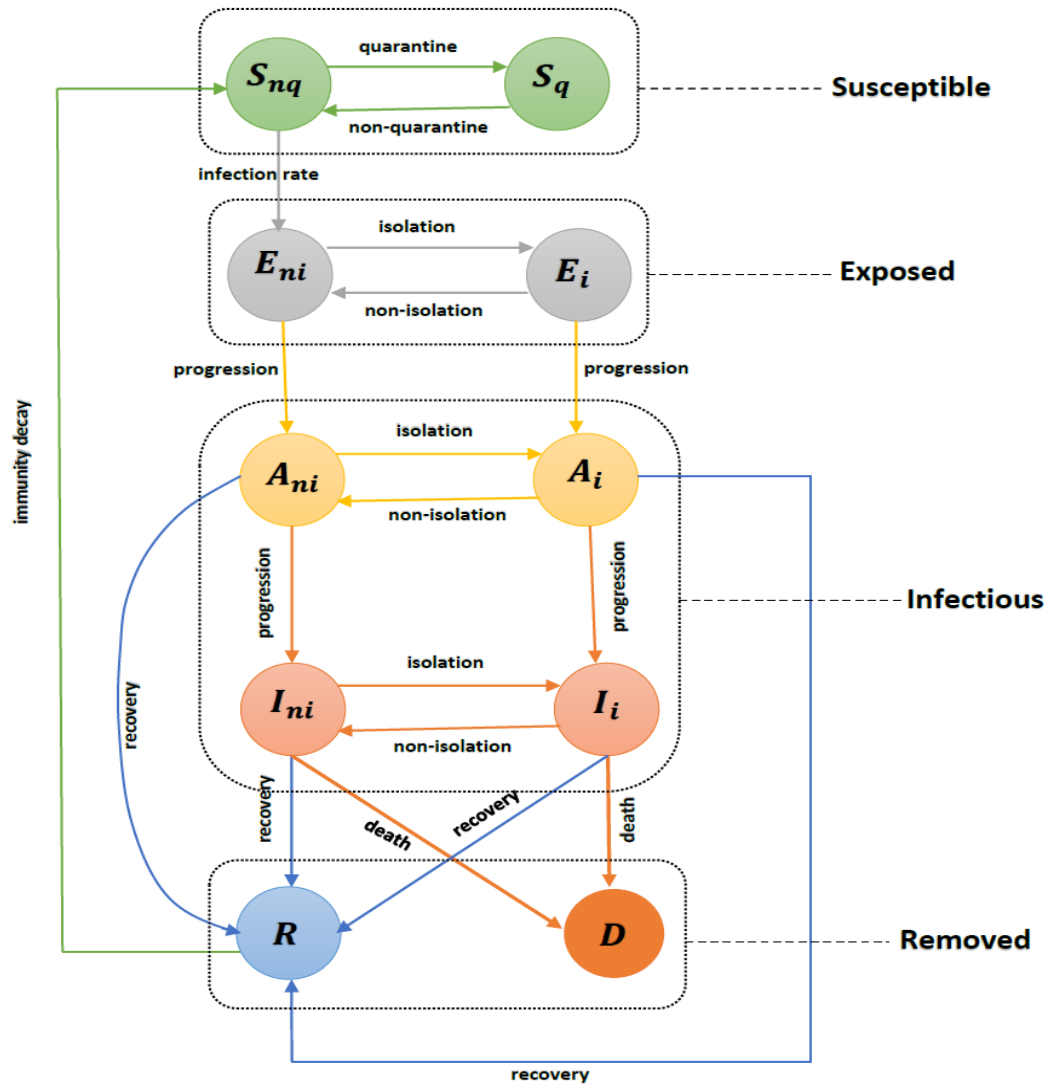

$S_{nq}$ : Susceptible non-quarantine;  $S_q$ : Susceptible quarantine;  
 $E_{ni}$ : Exposed non-isolated;  $E_i$ : Exposed isolated;  
 $A_{ni}$ : Asymptomatic non-isolated;  $A_i$ : Asymptomatic isolated;  
 $I_{nq}$ : Symptomatic non-isolated;  $I_i$ : Symptomatic isolated;  
 $R$ : Recovered;  $D$ : Disease-induced mortality.

**Figure 4:** Flow chart for the model defined by equation (1) for pathogen transmission dynamics within the WKU setting. Solid arrows indicate the transitions between compartments, with the associated *per capita* flow rates shown next to each arrow. The model partitions the total population into ten compartments: non-quarantine susceptible ( $S_{nq}$ ), quarantine susceptible ( $S_q$ ), non-quarantine exposed ( $E_{ni}$ ), isolated exposed ( $E_i$ ), non-isolated asymptotically infected ( $A_{ni}$ ), isolated asymptotically infected ( $A_i$ ), non-isolated symptomatically infected ( $I_{ni}$ ), isolated symptomatically infected ( $I_i$ ), recovered ( $R$ ), and deceased ( $D$ ) individuals. The state variables and parameters are defined in Table A1, and parameters values in Table A2.



$$\begin{aligned}
 \frac{dS}{dt} &= -\lambda(t)S + \omega R, \\
 \frac{dE}{dt} &= \lambda(t)S - \sigma E, \\
 \frac{dA}{dt} &= \sigma E - (\theta + \gamma)A, \\
 \frac{dI}{dt} &= \gamma I - (\tau + \delta)I, \\
 \frac{dR}{dt} &= \theta A + \tau I - \omega R, \\
 \frac{dD}{dt} &= \delta I.
 \end{aligned}
 \tag{1}$$

328 The sub-model (1) was augmented with an time-varying variables, “ $P$ ”, measuring the partici-  
 329 pants’ perception of risk regarding the number of symptomatic cases, so that

$$\frac{dP}{dt} = \delta I - mP.
 \tag{2}$$

330 where  $m$  represents the mean duration of participants’ reaction to the number of infections.

331 In addition, we used a time-varying transmission rate introduced by He et al. [56], which is  
 332 also known as effective (flexible) transmission rate, denoted by  $\beta(t)$ . It accounts for intervention  
 333 actions (modeled as a step function) and the reduction in contacts among individuals in response  
 334 to the proportion of cases, reflecting the epidemic’s severity. This variable transmission rate  $\beta(t)$  is  
 335 formulated in equation (3) below

$$\beta(t) = \beta_0(1 - \epsilon(t))\left(1 - \frac{P(t)}{N}\right)^\zeta.
 \tag{3}$$

336 Here, the parameter  $\epsilon$  represents interventions’ strength and  $\zeta$  aims to capture individuals’ response  
 337 intensity. Within this framework, the parameter  $P$  denotes risk perception. The individuals’ percep-  
 338 tion of risk increases with the number of infections, while decreasing over time, as reflected by the  
 339 two terms in equation (2). The parameters  $\beta$  and  $\epsilon$  are stepwise functions of time.

340 The dynamics between intervention strength ( $\epsilon$ ), response intensity ( $\zeta$ ), and risk perception  
 341 ( $P$ ) are critical for understanding and predicting disease spread. Adaptive behavioral responses,  
 342 influenced by real-time changes in perceived risk, significantly shape epidemic trajectories, and our  
 343 parameter choices can be justified as follows:

- 344 • **Intervention Strength ( $\epsilon$ ):** Represents the impact of public health measures, as the result of  
 345 their intrinsic effectivity but modulated by disease severity and compliance. Higher perceived  
 346 severity typically increases  $\epsilon$ , as it induces compliance with preventive actions.
- 347 • **Response Intensity ( $\zeta$ ):** Measures variability in individual responses to perceived infection  
 348 risk, often influenced by cultural and personal factors. As  $\zeta$  increases with social awareness  
 349 and effective communication, disease transmission would decrease from a baseline given by the  
 350 level of risk perception in the population.

- 351 • **Risk Perception ( $P$ ):** Individuals' perception of risk can respond to many factors, from  
352 pathogen infectivity, information access, and pre-existing attitudes. Heightened  $P$  can boost  
353 preventive adherence but may also lead to panic or misinformation, complicating control efforts.

354 Obviously, the relationship between these three parameters and their effect on disease transmission  
355 is potentially very complex. We have reached a tractable model by adopting equations (2) and (3)  
356 making the flexible transmission rate dependent on  $\epsilon$ ,  $\zeta$ , and  $P$ . In turn,  $P$ , with its dependence  
357 on the number of infections,  $I$ , and a built-in progressive decrease reflecting peoples' physiological  
358 traits such as forgetfulness and normalization, introduces these additional important elements into  
359 the transmission dynamics. Although simple, this framework has been applied extensively to model  
360 real outbreaks with satisfactory results [39, 55, 56, 85, 86].

361 Note that individuals in quarantine and isolation are restricted from further spreading the  
362 disease. As such, they do not contribute to transmission, and therefore,  $\lambda(t)$  in this case is defined  
363 as  $\lambda(t) = \beta(t) \left( \frac{A_{ni} + \alpha I_{ni}}{N} \right)$ , where  $\alpha$  serves as the modification parameter representing the reduced  
364 infectiousness. Also, our model assumes a Poisson process due to the low frequency of (simulated)  
365 fatal cases, which aligns well with the Poisson distribution's suitability for rare events. This approach  
366 is standard in epidemiological modeling for low-frequency events (see references [63, 71] for similar  
367 applications).

368 The mechanism of time-varying flexible transmission rate allows for the inclusion of human  
369 behavioral components, which have a considerable impact on disease dynamics. Specifically, we  
370 adopted a mechanistic transmission rate function based on prior studies [55, 56] to include individual  
371 behavioral actions. We consider three factors: (i) a time-varying risk perception by individuals (fear  
372 of infection, severe infection), modeled by  $P(t)$ , (ii) level of adherence of individuals to NPIs such  
373 as self-isolation, quarantine, or reporting, modeled by the parameter  $\zeta$ , and (iii) the effectiveness of  
374 the NPIs, modeled by the parameter  $\epsilon$  (Refer to the equation (3) above.) This technique has been  
375 used in prior studies on infectious disease transmission, including COVID-19 [55] and influenza [56],  
376 and is adaptable to our experimental scenarios. We explored each mechanism by treating the key  
377 parameters as a flexible (cubic spline) or time-varying function and comparing various formulations'  
378 fitting performance. Additionally, we can enhance the models in the future by incorporating further  
379 details, such as age structure, when data is available, to conduct more fine-grained experiments that  
380 could aid in pandemic preparedness and response. For further details and analysis of the model, see  
381 the Appendix section.

## 382 **3 Results: Evaluating the impact of individual perception** 383 **and NPI strength**

### 384 **3.1 Influence of individual perception and NPIs**

385 Our experimental data results provide critical insights into the dynamics of pathogen transmis-  
386 sion under varying levels of individual perception and NPIs during the WKU game. Fig. 5 illustrates  
387 the daily new cases across three distinct scenarios: a naive scenario with no interventions ( $\epsilon = 0$   
388 and  $\zeta = 0$ ), a scenario driven by individual perception (only  $\epsilon = 0$ ), and a combined scenario in-  
389 corporating both individual perceptions and NPIs. In the naive scenario, represented by the orange

390 solid curve, a rapid increase in new cases is observed, highlighting the unmitigated spread of the  
391 pathogen in the absence of any intervention. This serves as a baseline, demonstrating the potential  
392 severity of an outbreak without any behavioral change or NPIs. The second scenario, depicted by  
393 the red dashed curve, models the impact of individual behavioral responses to the perceived risk of  
394 infection. Here, participants adjusted their behavior based on the evolving outbreak situation, such  
395 as by reducing contacts or increasing protective measures like mask-wearing. The substantial reduc-  
396 tion in new cases in this scenario underscores the significant role that individual perception plays  
397 in controlling disease spread. This finding is consistent with previous research that emphasizes the  
398 importance of individual actions in epidemic management [55, 56]. The third scenario, represented  
399 by the green solid curve, combines individual perception with structured NPIs, such as quarantine  
400 and isolation. This scenario shows the most pronounced decrease in daily new cases, illustrating  
401 the enhanced effectiveness of combining adaptive human behavior with coordinated public health  
402 interventions. The grey curve with dots, representing simulated reported cases, aligns closely with  
403 the observed data, further validating the accuracy and predictive capability of our model.

## 404 **3.2 Evaluation of reporting ratios and model validation**

405 Fig. 6 (a) & (b) presents the reporting ratios between observed cases and model estimates under  
406 two scenarios: (a) the combined scenarios of individual perception and NPIs and (b) the scenario with  
407 individual perception only. The relatively stable reporting ratio observed in both scenarios indicates  
408 that the model effectively captures the dynamics of reporting behavior and the efficacy of interven-  
409 tions. This stability is crucial for ensuring that the model accurately reflects real-world dynamics,  
410 thereby providing reliable predictions of outbreak progression. The consistent reporting ratios also  
411 underscore the effectiveness of combining individual behavioral responses with structured NPIs in  
412 mitigating pathogen spread and ensuring reliable reporting. These findings highlight the importance  
413 of coordinated interventions that integrate both human behavior and public health strategies to  
414 achieve optimal outcomes during an epidemic. The insights gained from these simulations results  
415 set the stage for a detailed sensitivity analysis, which will be discussed in the subsequent section.  
416 This analysis aims to identify key parameters that drive transmission dynamics and intervention ef-  
417 fectiveness, offering further guidance for optimizing public health strategies during infectious disease  
418 outbreaks.

## 419 **3.3 Sensitivity analysis**

420 We conducted sensitivity analyses to assess the influence of our model's parameters on the  
421 transmission trajectory. The analysis underlined the varying relevance of each parameter and offered  
422 a more profound understanding of the underlying dynamics. The findings emphasize the critical  
423 role of prompt intervention and adherence to preventive measures in reducing the severity of the  
424 outbreak.

### 425 **3.3.1 Global sensitivity analysis**

426 In this sub-section, we aim to provide a paradigm that takes into account both individuals'  
427 perception of risk (which is modelled by  $\zeta$ ) and NPIs' strength (which is modelled by  $\epsilon$ ), as well as a

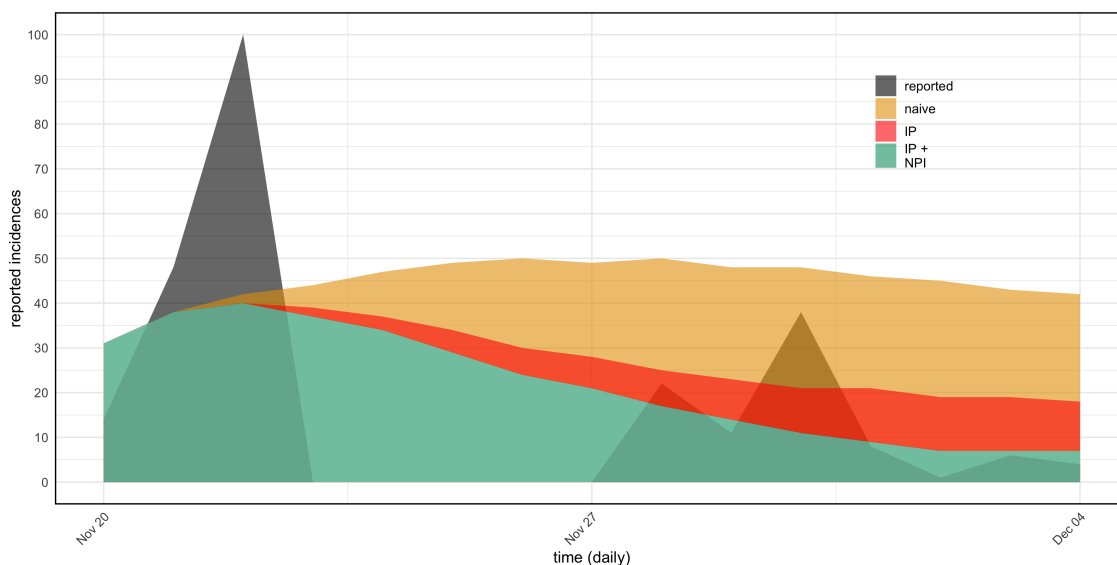

**Figure 5:** Daily new cases across three intervention scenarios during the WKU game represented by the black shadowed curve. The orange solid curve represents the naive scenario of the simulation with no interventions, showing a rapid increase in new cases. The red curve illustrates the scenario with individual perception based on behavior change, resulting in significant reduction in new cases. The green solid curve depicts the scenario combining individual reactions with NPIs such as quarantine and isolation, showing the most pronounced decrease in daily new cases. The grey curve with dots represents the simulated reported cases, aligned with official data, validating the accuracy of our model. Effect of intervention take some time (a couple of days) to show up in the data.

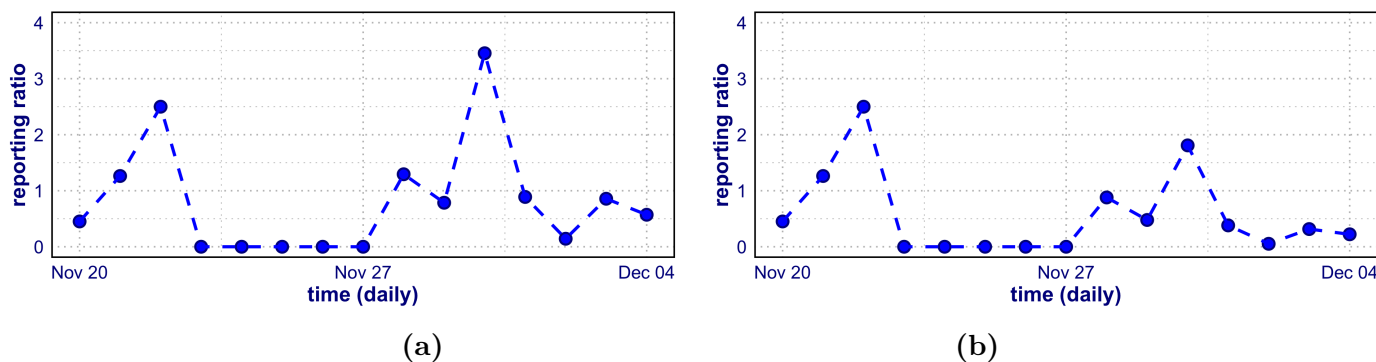

**Figure 6:** Reporting ratio between observed cases and model estimates under the combined scenario of individual perception (IP) and non-pharmaceutical Intervention (NPIs) (a) and IP only (b), respectively. The relatively stable ratio indicates that the model accurately captures the dynamics of reporting behavior and intervention efficacy. This stability underscores the effectiveness of coordinated interventions in mitigating the pathogen’s spread and ensuring consistent reporting accuracy.

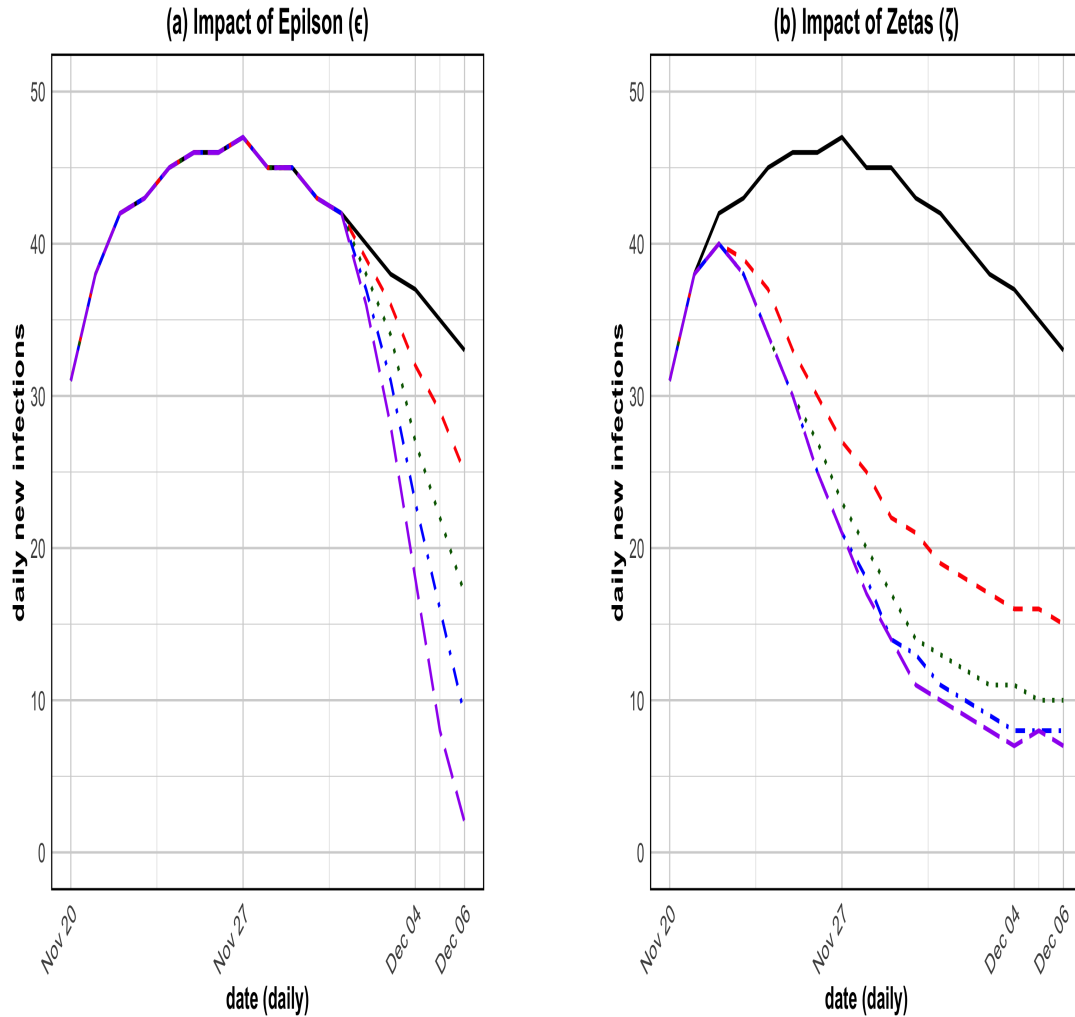

**Figure 7:** Sensitivity analysis illustrating the effects of parameters  $\epsilon$  (a) and  $\zeta$  (b) on transmission dynamics. Our analysis reveals that while both parameters significantly influence the epidemic trajectory,  $\zeta$  (which measures the intensity of individual response) has a notably stronger impact than  $\epsilon$  (which measures the intervention strength), which indicates that modest increases in  $\epsilon$  result in a measurable reduction in transmission, but even a slight increase in  $\zeta$  leads to a much more substantial decrease in transmission rates. This highlights the critical role of  $\zeta$  in effective pathogen control, surpassing the influence of  $\epsilon$ .

428 time-dependent reporting rate through sensitivity analysis, and also to determine how the parameters  
429  $\zeta$  and  $\epsilon$  affect the pathogen spread [55]. Our analysis demonstrates that both  $\zeta$  and  $\epsilon$  play vital roles  
430 in shaping transmission patterns, although  $\zeta$  shows greater magnitude. Specifically, we found that  
431  $\zeta$  exerts a more pronounced effect on transmission dynamics compared to  $\epsilon$ . Small increases in  $\epsilon$  or  
432  $\zeta$  could result in decreased transmission, as shown in Fig. 7 (a) & (b), but the impact is relatively  
433 low for  $\epsilon$  compared to  $\zeta$ , which causes substantial decreases in transmission, indicating a higher  
434 sensitivity to changes in this parameter. This result stresses the role of  $\epsilon$  and  $\zeta$  in determining  
435 the course of an epidemic and highlights the importance of tailored measures to effectively control  
436 outbreaks. Therefore, through sensitivity analysis, we have gained valuable insights into the relative  
437 influence of  $\epsilon$  and  $\zeta$ , enabling us to optimize intervention strategies and enhance our understanding  
438 of the underlying transmission mechanisms. This knowledge is crucial for informing public health  
439 policies and improving pandemic preparedness.

### 440 3.3.2 Local sensitivity analysis

441 To delve deeper into our model's dynamics and parameter effects, we conducted a sensitivity  
442 analysis using partial rank correlation coefficients (PRCCs) to assess how model parameters influence  
443 the overall transmission [62, 67]. Utilizing PRCCs with  $R_0$  as the response function, we identified  
444 the most effective parameters influencing the spread of the pathogen. See Fig. 8(a) and (b). Our  
445 sensitivity analysis involved sampling 5,000 random instances from uniform distributions within the  
446 specified parameter ranges. Each instance was simulated to produce biological outcomes, and PRCCs  
447 were calculated between parameters and biological values. The PRCCs for  $R_0$  highlighted that the  
448 transition rate of exposed non-isolated individuals to the infected non-isolated class, along with the  
449 probability of transmission per contact, significantly influence  $R_0$ . These findings emphasize the im-  
450 portance of targeted interventions to reduce interactions among susceptible and infected individuals  
451 and decrease the probability of transmission per contact. Even minor adjustments to these critical  
452 parameters could substantially impact the infection's spread, underscoring the necessity for effective  
453 public health measures and timely interventions to control the outbreak.

### 454 3.4 Numerical simulations

455 In this section, we conducted numerical simulations of the simplified model to evaluate the in-  
456 fluence of key parameters on transmission dynamics. The contour plots illustrate the dependency of  
457 the basic reproduction number ( $R_0$ ) on several critical parameters. Fig. 9 (a) shows the relationship  
458 between  $R_0$ ,  $\beta$  (probability of transmission per contact), and  $\theta$  (recovery rate of symptomatically  
459 infected individuals). The plot demonstrates that higher values of  $\beta$  result in an increase in  $R_0$ , while  
460 higher  $\theta$  values lead to a decrease in  $R_0$ , underscoring the critical importance of reducing transmis-  
461 sion and increasing recovery rates to effectively control pathogen spread. Fig. 9 (b) presents the  
462 relationship between  $R_0$ ,  $\delta$  (disease-induced death rate), and  $\alpha$  (modification parameter for decreased  
463 infectiousness). The results show that increasing both  $\delta$  and  $\alpha$  significantly lowers  $R_0$ , highlighting  
464 the importance of interventions that reduce infectiousness and disease severity in mitigating out-  
465 breaks. Finally, Fig. 9 (c) depicts the relationship between  $R_0$ ,  $\tau$  (recovery rate of symptomatically  
466 infected individuals), and  $\alpha$  (modification parameter for decreased infectiousness). The plot reveals  
467 that higher values of  $\tau$  and  $\alpha$  both contribute to a reduction in  $R_0$ , reinforcing the importance of



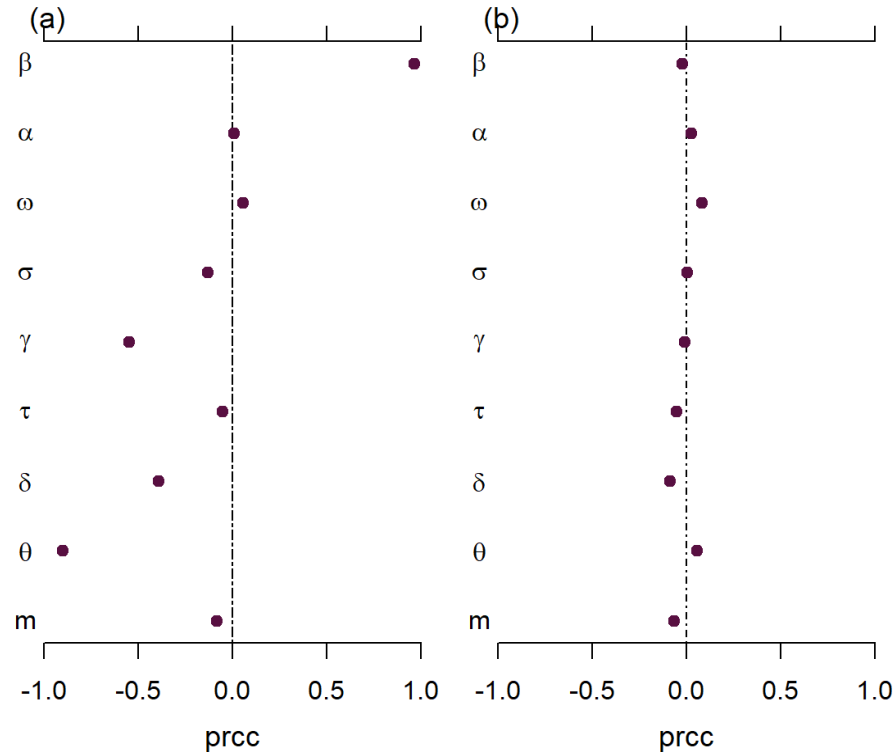

**Figure 8:** Local sensitivity analysis using (a)  $R_0$  and (b) the attack rate as response functions, assessed through partial rank correlation coefficients (PRCCs). The analysis identifies the transition rate from exposed non-isolated individuals to the infected non-isolated class, along with the probability of transmission per contact, as the most influential parameters on both  $R_0$  and the attack rate. These results emphasize the critical need for targeted interventions focusing on these key parameters to effectively control the outbreak and reduce transmission rates.

468 rapid recovery and lowering infectiousness as effective strategies for outbreak control. These findings  
469 emphasize the critical role of reducing transmission probability, increasing recovery rates, and miti-  
470 gating disease severity in controlling infectious disease outbreaks. While other parameters could also  
471 be explored in future simulations, we focus on  $\beta$ ,  $\theta$ ,  $\delta$ ,  $\alpha$ , and  $\tau$  due to their significant influence on  
472 transmission dynamics in the model. These key parameters offer valuable insights into how targeted  
473 interventions can alter the course of an epidemic, demonstrating the robustness and applicability of  
474 our model to real-world public health scenarios.

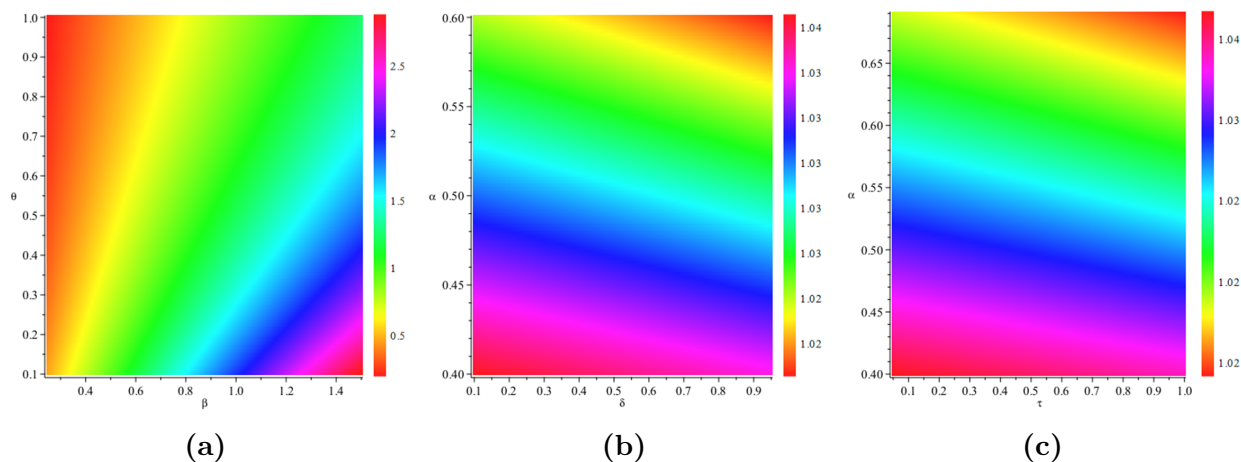

**Figure 9:** Contour plots of the basic reproduction number ( $R_0$ ) for the model (1), as a function of (a) transmission rate ( $\beta_0$ ) and recovery rate of symptomatically infected individuals ( $\theta$ ), (b) disease-induced death rate ( $\delta$ ) and modification parameter for decreased infectiousness ( $\alpha$ ), and (c) recovery rate of symptomatically infected individuals ( $\tau$ ) and modification parameter for decreased infectiousness ( $\alpha$ ), respectively. Parameter values used are provided in Table A2.

## 475 4 Discussion

476 The epidemic game conducted at WKU provided a unique opportunity to pilot our app-based  
477 experimentation platform during an open-world realistic "mock" outbreak, engaging nearly 1,000  
478 students over two weeks. This large-scale proximity-based experiment integrated behavioral experi-  
479 ments and generated multimodal data, including contact and transmission patterns (see Figs. 3 and  
480 A1), highlighting the platform's potential for interdisciplinary research. WKU students gained prac-  
481 tical experience by participating in the experiment, while a subgroup of the students were actively  
482 involved in planning and organizing the activity around campus. The resulting data are available  
483 for instructors to use during classes and further epidemiological analyses. This data are particularly  
484 significant given its realistic representation of a real-life outbreak scenario in a university campus,  
485 thereby supporting the platform's capacity to generate rich multimodal epidemiology datasets with  
486 external validity. [3, 22, 25].

487 Our in-depth study used a robust modeling approach to investigate pathogen spread during  
488 the WKU game. We designed an effective model framework (Figs. 4 & A6) to assess interven-  
489 tion strategies including quarantine and isolation, incorporating human behavioral perspectives and  
490 non-pharmaceutical interventions (NPIs). We conducted detailed model simulations and sensitivity  
491 analyses using the data generated from the experiment. Model fitting and parameter estimates (Fig.  
492 A7) demonstrated that our flexible transmission rate model effectively describes the transmission  
493 dynamics observed in the experiment. The inclusion of human behavioral factors, such as individual  
494 adherence to preventative actions and the assessment of risk, greatly enhanced the model's accu-  
495 racy. The predicted parameters accurately depicted the transmission situations, highlighting the  
496 significance of prompt and synchronized interventions [3, 43, 56].

497 Our model represents a significant step forward in the integration of dynamic behavioral factors  
498 into epidemiological modeling. Unlike traditional models that often treat behavioral responses as  
499 static or oversimplified, our approach accounts for the fluidity of human behavior during an outbreak.  
500 Individuals in our model can adjust their adherence to NPIs such as social distancing, mask-wearing,  
501 isolation and quarantine based on real-time changes in disease severity and perceived personal risk [30,  
502 36]. This dynamic response is critical for understanding the true impact of public health interventions  
503 and for predicting the course of an epidemic [37, 38].

504 However, while our model incorporates a more realistic representation of behavior, it does not  
505 fully capture the entire spectrum of potential responses. Behavioral heterogeneity, influenced by  
506 factors such as cultural norms, misinformation, and varying levels of trust in public health messages,  
507 presents a complex challenge for modeling [39, 40]. Our findings suggest that while the inclusion  
508 of dynamic behavior significantly improves the accuracy of epidemiological predictions, there is still  
509 a need for further refinement. Future models should aim to incorporate more granular data on  
510 behavioral responses, potentially integrating psychological and sociological insights to better capture  
511 the diversity of human actions in the face of an epidemic. This ongoing refinement will be crucial  
512 for developing models that can more effectively inform public health strategies and interventions,  
513 particularly in diverse and rapidly changing real-world settings [30, 36].

514 The model simulation results presented in Fig. 5 underscore the profound impact of individual  
515 behavior and NPIs on disease transmission dynamics. The naive scenario, which operates under  
516 the assumption of no interventions, illustrated a rapid and uncontrolled spread of the pathogen,

517 emphasizing the critical need for timely interventions to prevent widespread transmission. In contrast,  
518 scenarios incorporating individual reactions to the outbreak demonstrated a significant reduction in  
519 new cases. The red dashed curve in Fig. 5 reflects this impact, where behavioral responses such  
520 as social distancing, mask-wearing, and self-isolation markedly decrease transmission rates. Human  
521 behavior plays a pivotal role in controlling the spread of infectious diseases, as individuals' decisions  
522 to adopt preventive measures can substantially alter the trajectory of an epidemic [55, 56, 44]. The  
523 most pronounced decrease in daily new cases was observed in the scenario combining individual  
524 reactions with NPIs, depicted by the green solid curve. This scenario incorporates measures such as  
525 quarantine, isolation, and contact tracing alongside individual behavioral responses. The synergistic  
526 effect of these combined strategies results in a substantially flatter epidemic curve, demonstrating the  
527 efficacy of coordinated intervention efforts. The alignment of simulated reported cases with official  
528 data, shown by the grey curve with dots, further validates the model's accuracy and predictive  
529 capability.

530 The analysis of the reporting ratio in Fig. 6 adds another layer of validation to our model.  
531 The stability of the reporting ratio when both individual reactions and NPIs were implemented  
532 indicates that the model accurately captures the dynamics of reporting behavior and the effectiveness  
533 of interventions. This consistency is crucial for effective outbreak management, ensuring reliable  
534 data for decision-making and policy formulation. Accurate and stable reporting is essential for  
535 monitoring the outbreak and adjusting intervention strategies in real-time. These findings emphasize  
536 the critical role of NPIs and individual behavior in managing the spread of infectious diseases.  
537 Timely and decisive interventions, coupled with public compliance, are key to controlling outbreaks.  
538 Public health strategies must prioritize raising awareness about preventive measures and ensuring  
539 public cooperation. Campaigns to educate the public on the importance of these measures can  
540 significantly enhance compliance and effectiveness of interventions. The robustness of our model,  
541 validated through these simulations and sensitivity analyses, further underscores its applicability in  
542 real-world epidemiological studies and public health planning. By integrating human behavior and  
543 NPIs, the model provides a comprehensive tool for predicting outbreak trajectories and designing  
544 effective intervention strategies. This integrated approach is essential for optimizing public health  
545 responses and improving pandemic preparedness [25, 65].

546 Our study aligns with previous research indicating that combined individual and population-  
547 level actions are crucial in mitigating the spread of infectious diseases [25, 55, 56]. The insights gained  
548 from this experiment provide valuable guidance for future outbreak management and emphasize the  
549 importance of coordinated, multifaceted intervention strategies [25, 69]. Furthermore, our model  
550 simulation results demonstrate that individual behavior and NPIs are indispensable in controlling  
551 disease transmission. The effectiveness of these measures in reducing new cases and maintaining  
552 stable reporting ratios highlights the importance of a comprehensive and coordinated public health  
553 response. These findings provide a robust foundation for developing strategies to manage future  
554 outbreaks, ensuring both public compliance and effective intervention implementation.

555 To further highlight the effectiveness of key parameters such as  $\epsilon$  (which measures the efficacy of  
556 intervention) and  $\zeta$  (which measures the intensity of behavioral response), global sensitivity analysis  
557 simulations were conducted and depicted in Fig. 7. Our findings showed that minor increases in  $\epsilon$  and  
558  $\zeta$  can significantly reduce transmission, with  $\zeta$  having a more noticeable impact. This emphasizes the  
559 significance of robust and intensive measures in containing the outbreak. In addition, local sensitivity

560 analysis (see Fig. 8), which has  $R_0$  as the response function, analyzed based on the PRCC, identified  
561 the transition rate of exposed non-isolated individuals to the infected non-isolated class ( $\sigma_n$ ) and  
562 the probability of transmission per contact ( $\beta$ ) as the most critical parameters impacting  $R_0$ . These  
563 variables have a major impact on basic reproduction numbers, indicating their significance in control.  
564 Furthermore, contour plot simulations provided valuable visual insights into the interactions between  
565 critical model parameters and their impact on the basic reproduction number,  $R_0$ . In Fig. 9 (a),  
566 the simulations highlight the relationship between  $\beta$  (probability of transmission per contact) and  $\theta$   
567 (recovery rate of symptomatically infected individuals), revealing that higher values of  $\beta$  significantly  
568 increase  $R_0$ , while increasing  $\theta$  effectively reduces  $R_0$ . This underscores the importance of both lim-  
569 iting transmission rates and enhancing recovery efforts in mitigating the spread of the pathogen.  
570 Similarly, Fig. 9 (b) illustrates the sensitivity of  $R_0$  to  $\delta$  (disease-induced death rate) and  $\alpha$  (modifi-  
571 cation parameter for decreased infectiousness). The simulations show that increases in both  $\delta$  and  $\alpha$   
572 result in a notable reduction in  $R_0$ , highlighting the critical role of interventions aimed at reducing  
573 disease severity and infectiousness in controlling outbreaks. Lastly, Fig. 9 (c) depicts the relationship  
574 between  $R_0$ ,  $\tau$  (recovery rate of symptomatically infected individuals), and  $\alpha$ . The results demon-  
575 strate that higher recovery rates and reduced infectiousness both contribute significantly to lowering  
576  $R_0$ , emphasizing the importance of rapid treatment and measures aimed at reducing the spread of  
577 infection. These contour plot simulations reinforce the notion that strategic interventions targeting  
578 key parameters—such as transmission probability, recovery rates, and infectiousness—are essential  
579 for effective epidemic control. By focusing on reducing transmission and enhancing recovery efforts,  
580 public health strategies can be optimized to limit the spread of disease and lower the reproduction  
581 number [25, 69]. This analysis underscores the critical need for coordinated, data-driven interven-  
582 tions tailored to the specific dynamics of each outbreak. Further numerical simulations (presented  
583 in A8) highlight the significant influence of key epidemiological parameters—transmission rate ( $\beta_0$ ),  
584 recovery rate ( $\theta$ ), and progression rate ( $\gamma$ )—on disease dynamics. Variations in  $\beta$  notably impact  
585 both asymptomatic and symptomatic infections, with a 50% increase leading to substantial rises in  
586 case numbers, underscoring the need for interventions like social distancing and mask-wearing to  
587 mitigate transmission. Similarly, enhancing recovery rates ( $\theta$ ) by 50% reduces the infectious period  
588 for asymptomatic individuals, while slowing the progression from asymptomatic to symptomatic  
589 stages ( $\gamma$ ) helps to alleviate the burden of symptomatic cases. These findings emphasize the critical  
590 role of reducing transmission, speeding up recovery, and delaying disease progression in controlling  
591 outbreaks effectively.

## 592 Conclusion

593 In conclusion, this study elucidates the significance of our platform as a powerful tool for study-  
594 ing pathogen transmission and evaluating the impact of human behavior and NPIs on disease dy-  
595 namics via an open-world experimental game approach. The integration of a flexible, time-varying  
596 transmission rate model in the analyses significantly enhances our understanding of how behavioral  
597 factors and NPIs influence the spread of infectious diseases. By accurately capturing these complex  
598 dynamics, our model provides critical insights into effective outbreak management strategies, under-  
599 scoring the importance of timely, coordinated interventions and adherence to preventive measures.  
600 Our experimentation platform’s ability to generate realistic multimodal datasets—encompassing epi-

601 demiological, behavioral, and network data streams—could prove very valuable for public health  
602 planning and pandemic preparedness. The robustness and applicability of our model, validated  
603 through rigorous simulation and sensitivity analyses, highlight its potential as an important tool for  
604 guiding public health policies and optimizing response strategies in future outbreak scenarios. Future  
605 research will aim to refine this approach by incorporating additional data streams and elements such  
606 as age structure and varying interaction patterns, thereby advancing our understanding of disease  
607 dynamics. Coupling the model with a game-theoretic approach to analyze behavior during the ex-  
608 periments could further enrich our insights into outbreak management, ultimately contributing to  
609 more effective public health strategies and a deeper preparedness for future health crises.

## 610 **Strengths**

611 Our study on the experimental game using the epidemic app at WKU demonstrates significant  
612 strengths. The large-scale, real-life experiment, involving nearly 1,000 students over two weeks, pro-  
613 vided a detailed dataset closely mirroring real-world outbreaks. This rich dataset enabled rigorous  
614 analysis of pathogen transmission dynamics and the effectiveness of intervention strategies. A key  
615 strength of this research is the integration of behavioral data with epidemiological modeling. Our  
616 experimentation platform facilitated the collection of multimodal data, including epidemiological, be-  
617 havioral, and network streams, offering a comprehensive view of disease dynamics. Our model, which  
618 incorporates human behavior and NPIs, accurately reflected the transmission patterns observed dur-  
619 ing the experiment. The robustness of our approach is further supported by extensive simulations and  
620 sensitivity analyses, validating the model’s accuracy and its applicability to public health planning.  
621 Moreover, the platform’s ability to generate realistic, high-quality data underscores its potential as  
622 a valuable tool for enhancing outbreak response strategies and pandemic preparedness.

## 623 **Limitations**

624 Despite the strengths of our study, we must acknowledge several limitations. The assumption  
625 of homogeneous mixing within sub-populations may oversimplify real-world interactions, potentially  
626 affecting model accuracy in diverse populations. While time-varying parameters were incorporated  
627 to reflect adaptive behaviors, some parameters were assumed constant, which may not fully capture  
628 the dynamics of real-world epidemics. The use of an exponential distribution for transitions between  
629 epidemiological states simplifies the model but may not accurately represent actual waiting time dis-  
630 tributions. Additionally, the model does not account for demographic variations, such as age/group  
631 structure and varying interaction patterns, which could provide deeper insights into disease dynamics  
632 and intervention effects. The findings from the WKU game, while valuable, may not be fully gen-  
633 eralizable to other settings with different population dynamics and intervention strategies. Further  
634 experiments in diverse environments are needed to validate and refine the model, which is why our  
635 long-term plans would include extending the platform to support a wide range of field experiments  
636 to study transmissible diseases.

637 Lastly, using smartphones’ Bluetooth radio to detect proximal contacts between individuals in  
638 physical space can introduce missing data and inaccuracies. This is due to the inherent noise in the  
639 Bluetooth signal and technical issues such as varying hardware capabilities and incomplete adherence



640 to the Bluetooth specs from smartphone makers, particularly on Android. We are currently working  
641 together with the developers of the Herald project to address these issues, and upcoming versions of  
642 the app will likely feature more accurate and robust contact detection.

## 643 **Implication for Public Health**

644 This study underscores the importance of integrating human behavioral dynamics and NPIs into  
645 epidemiological models to improve public health responses during disease outbreaks. The experiment  
646 conducted at WKU demonstrated how real-time behavioral changes, such as adherence to social dis-  
647 tancing, isolation and quarantine measures, can significantly alter the trajectory of an epidemic. By  
648 incorporating these adaptive behaviors into our model, we were able to provide more accurate pre-  
649 dictions of disease transmission and identify the most effective intervention strategies. This approach  
650 emphasizes the importance of public health policies that are both responsive and adaptive, taking  
651 into account the dynamic nature of human behavior in response to changing outbreak conditions.

652 Also, the platform's ability to generate comprehensive, multimodal datasets offers a valuable  
653 tool for public health planning and pandemic preparedness (for similar outbreak data generator, see  
654 [22]). The data-driven insights from this study can inform the design of targeted interventions that  
655 consider not only the biological aspects of disease spread but also the complex social and behavioral  
656 factors that influence public compliance and the effectiveness of NPIs. As public health officials  
657 navigate the challenges of controlling infectious diseases, the findings from this research provide  
658 a robust framework for developing strategies that are both evidence-based and adaptable to the  
659 changing dynamics of human behavior and pathogen transmission.

## 660 **Declarations**

661 **Ethics approval and consent to participate:** The UMass Chan Medical School IRB determined  
662 that the research described in this manuscript is non-human research as defined by U.S. Department  
663 of Health and Human Services and Food and Drug Administration regulations (UMass Chan IRB  
664 ID: STUDY00000039); therefore there was no need for informed consent from participants of the  
665 experimental epidemic game at WKU. The protocol for the experimental game was approved by  
666 WKU Ethics Committee.

667 **Availability of data and source code:** The analysis scripts, written in the R statistical language,  
668 are available together with usage documentation at GitHub this repository: [https://github.com/](https://github.com/colabobio/wku-game-epi-modeling)  
669 [colabobio/wku-game-epi-modeling](https://github.com/colabobio/wku-game-epi-modeling), and the data from the WKU game at this Zenodo repository:  
670 <https://zenodo.org/records/10674401>.

671 **Funding:** The development of the original Operation Outbreak app and backend infrastructure has  
672 been supported by the Gordon and Betty Moore Foundation (grants GBMF9125, GBMF9125.01, and  
673 GBMF11392). The customizations of the app and backend required for the WKU game were funded  
674 by a startup grant awarded by UMass Chan Medical School to AC.

675 **Acknowledgements:** We thank the WKU students and faculty for supporting this research through  
676 their involvement in the WKU game, especially the team of WKU students who participated in the  
677 design of the activity, promoted it on campus, managed participants and provide them with informa-  
678 tion, distributed prizes, and assisted in organizing, collecting and classifying survey questionnaires  
679 (Xiangyuan Yu, Siyu Chen, He Bingze, Sixun Hou, Jinfan Jiang, Yiming Luo, HongYuan Miao,  
680 Ruiying Wang, Yueran Wang, Xuemian Xiang, and Zhang Tao). We also acknowledge Zhang Zirui  
681 for providing administrative support at WKU, Adam Fowler, creator and developer of the Herald  
682 Proximity project, Prof. Laurent Hébert-Dufresne from the Vermont Complex Systems Center at the  
683 University of Vermont for critical reading of the manuscript, and the Operation Outbreak team at the  
684 Broad Institute of Harvard and MIT, including Prof. Pardis Sabeti and Dr. Todd Brown (Operation  
685 Outbreak co-creators together with AC) and Kian Sani (Operation Outbreak product and program  
686 manager), for their support, and Fathom Information Design for the design and development of  
687 Operation Outbreak visualization tools.

688 **Conflict of Interests:** None.

689 **Authors' Contributions:** SSM, WM: conceptualization, data analysis, results, figures, manuscript  
690 writing; TI: figures, manuscript editing; YD, MK: user interface and graphic design; AG, HH: software  
691 development; AW, DK: planning, manuscript revision; SAN, JGY: conceptualization; AC: project  
692 lead, conceptualization, planning, manuscript writing, and funding acquisition.

## 693 References

- 694 [1] Pandit JA, Radin JM, Quer G, Topol EJ. Smartphone apps in the COVID-19 pandemic. *Nat Biotechnol* 2022;  
695 40(7): 1013-1022. doi: 10.1038/s41587-022-01350-x.
- 696 [2] Colubri A, Kemball M, Sani K, Boehm C, Mutch-Jones K, Fry B, Brown T, Sabeti PC. Preventing  
697 outbreaks through interactive, experiential real-life simulations. *Cell* 2020; 182(6): 1366-1371. doi:  
698 10.1016/j.cell.2020.08.042.
- 699 [3] Specht I, Sani K, Loftness BC, Hoffman C, Gionet G, Bronson A, Marshall J, Decker C, Bailey L, Siyanbade T,  
700 Kemball M. Analyzing the impact of a real-life outbreak simulator on pandemic mitigation: an epidemiological  
701 modeling study. *Patterns* 2022; 3(8): 100358.
- 702 [4] Operation Outbreak mobile application for iPhones on the Apple App Store. Available from:  
703 <https://apps.apple.com/us/app/operation-outbreak/id1455638160>. Last accessed: September 15, 2024.
- 704 [5] Operation Outbreak mobile application for Android smartphones on the Google Play store. Available from:  
705 <https://play.google.com/store/apps/details?id=org.broadinstitute.o2>. Last accessed: September 15, 2024.
- 706 [6] Lofgren ET, Fefferman NH. The untapped potential of virtual game worlds to shed light on real world epidemics.  
707 *Lancet Infect Dis* 2007; 7(9): 625-9. doi: 10.1016/S1473-3099(07)70212-8.
- 708 [7] Williams D. The Mapping Principle, and a Research Framework for Virtual Worlds. *Communication theory* 2010;  
709 20(4): 451-70. doi: 10.1111/j.1468-2885.2010.01371.x.
- 710 [8] Colubri A, Brown T, Pardis PC. When It Comes to Disease, Why Wait for a Pandemic to Respond? *Wired*.  
711 2019. Available from: <https://www.wired.com/story/opinion-disease-simulation/>.
- 712 [9] Wenzhou-Kean University information page from Kean University. Available from: <https://www.kean.edu/wku>.  
713 Last accessed: September 17, 2024.
- 714 [10] Herald Proximity project website. Available from: <https://heraldprox.io/>. Last accessed: September 17, 2024.
- 715 [11] Flutter framework website. Available from: <https://flutter.dev/>. Last accessed: September 17, 2024.
- 716 [12] Operation Outbreak website. Available from: <https://operationoutbreak.org/>. Last accessed: September 17, 2024.
- 717 [13] FluPhone Project. Available from: <https://www.cl.cam.ac.uk/research/srg/netos/projects/archive/fluphone2/>.  
718 Last accessed: September 17, 2024.
- 719 [14] Dandekar R, Henderson SG, Jansen HM, McDonald J, Moka S, Nazarathy Y, Rackauckas C, Taylor PG, Vuorinen  
720 A. Safe Blues: The case for virtual safe virus spread in the long-term fight against epidemics. *Patterns* 2021;  
721 2(3): 100220. doi: 10.1016/j.patter.2021.100220.
- 722 [15] Allen K, Brändle F, Botvinick M, Fan JE, Gershman SJ, Gopnik A, Griffiths TL, Hartshorne JK, Hauser TU,  
723 Ho MK, de Leeuw JR, et al. Using games to understand the mind. *Nat Hum Behav* 2024; 8(6): 1035-1043. doi:  
724 10.1038/s41562-024-01878-9.
- 725 [16] Cates JR, Fuemmeler BF, Diehl SJ, Stockton LL, Porter J, Ihekweazu C, Gurbani AS, Coyne-Beasley T. Devel-  
726 oping a serious videogame for preteens to motivate HPV vaccination decision making: Land of Secret Gardens.  
727 *Games Health J* 2018; 7(1): 51-66. doi: 10.1089/g4h.2017.0002.
- 728 [17] Wang Z, Jusup M, Guo H, Shi L, Geček S, Anand M, Perc M, Bauch CT, Kurths J, Boccaletti S, Schellnhuber  
729 HJ. Communicating sentiment and outlook reverses inaction against collective risks. *Proc Natl Acad Sci USA*  
730 2020; 117(30): 17650-17655. doi: 10.1073/pnas.1922345117.
- 731 [18] Mkandawire W, Dong Y, Grozdani A, Hong H, Khandpekar M, Inekwe T, Collins J, Fowler A, Musa SS, Col-  
732 ubri A. Introducing Epidemica: an proximity-based platform to study infectious disease transmission through  
733 experimental epidemic games. In preparation.
- 734 [19] Asanjarani A, Shausan A, Chew K, Graham T, Henderson SG, Jansen HM, Short KR, Taylor PG, Vuorinen A,  
735 Yadav Y, Ziedins I. Emulation of epidemics via Bluetooth-based virtual safe virus spread: experimental setup,  
736 software, and data. *PLOS Digit Health* 2022; 1(12): e0000142.

- 737 [20] Sau A. A simulation study on hypothetical Ebola virus transmission in India using spatiotemporal epidemiological  
738 modeler (STEM): a way towards precision public health. *J Environ Public Health* 2017; **2017**: 7602301.
- 739 [21] Bakalos N, Kaselimi M, Doulamis N, Doulamis A, Kalogeras D, Bimpas M, Davradou A, Vlachostergiou A,  
740 Fotopoulos A, Plakia M, Karalis A. STAMINA: Bioinformatics platform for monitoring and mitigating pandemic  
741 outbreaks. *Technologies* 2022; **10**(3): 63.
- 742 [22] Orchard F, Clain C, Madie W, Hayes JS, Connolly MA, Sevin E, Sentís A. PANDEM-Source, a tool to collect or  
743 generate surveillance indicators for pandemic management: a use case with COVID-19 data. *Front Public Health*  
744 2024; **12**: 1295117.
- 745 [23] Karaarslan E, Aydın D. An artificial intelligence–based decision support and resource management system for  
746 COVID-19 pandemic. In: *Data Sci COVID-19* 2021; 25-49.
- 747 [24] Chondros C, Nikolopoulos SD, Polenakis I. An integrated simulation framework for the prevention and mitigation  
748 of pandemics caused by airborne pathogens. *Netw Model Anal Health Inform Bioinform* 2022; **11**(1): 42.
- 749 [25] Reingruber J, Papale A, Ruckly S, Timsit JF, Holcman D. Data-driven multiscale dynamical framework to control  
750 a pandemic evolution with non-pharmaceutical interventions. *PLoS One* 2023; **18**(1): e0278882.
- 751 [26] Kleczkowski A, Maharaj S, Rasmussen S, Williams L, Cairns N. Spontaneous social distancing in response to a  
752 simulated epidemic: a virtual experiment. *BMC public health* 2015; **15**(1). doi: 10.1186/s12889-015-2336-7.
- 753 [27] Woike JK, Hafenbrädl S, Kanngiesser P, Hertwig R. The transmission game: Testing behavioral interventions in  
754 a pandemic-like simulation. *Sci Advances* 2022; **8**(8): eabk0428. doi: 10.1126/sciadv.abk0428.
- 755 [28] Nunner H, Buskens V, Corten R, Kaandorp C, Kretzschmar M. Disease avoidance threatens social cohesion in a  
756 large-scale social networking experiment. *Sci Rep* 2023; **13**(1): 22586. doi: 10.1038/s41598-023-47556-0.
- 757 [29] Nabi KN, Ovi MA, Kabir KA. Analyzing evolutionary game theory in epidemic management: A study on social  
758 distancing and mask-wearing strategies. *PLoS One* 2024; **19**(6): e0301915.
- 759 [30] Saad-Roy CM, Traulsen A. Dynamics in a behavioral–epidemiological model for individual adherence to a non-  
760 pharmaceutical intervention. *Proc Natl Acad Sci USA* 2023; **120**(44): e2311584120.
- 761 [31] de-Camino-Beck T, Lewis MA, Van den Driessche P. A graph-theoretic method for the basic reproduction number  
762 in continuous time epidemiological models. *J Math Biol* 2009; **59**(4): 503-516.
- 763 [32] Fung T, Goh J, Chisholm RA. Long-term effects of non-pharmaceutical interventions on total disease burden in  
764 parsimonious epidemiological models. *J Theor Biol* 2024; **587**: 111817.
- 765 [33] Käding N, Waldeck F, Meier B, Boutin S, Borsche M, Balck A, Föh B, Kramer J, Klein C, Katalinic A, Rupp J.  
766 Influence of non-pharmaceutical interventions during the COVID-19 pandemic on respiratory viral infections—a  
767 prospective population-based cohort study. *Front Public Health* 2024; **12**: 1415778.
- 768 [34] He X, Chen H, Zhu X, Gao W. Non-pharmaceutical interventions in containing COVID-19 pandemic after the  
769 roll-out of coronavirus vaccines: a systematic review. *BMC Public Health* 2024; **24**.
- 770 [35] Maglietta G, Puntoni M, Caminiti C, Pession A, Lanari M, Caramelli F, Marchetti F, De Fanti A, Iughetti  
771 L, Biasucci G, Suppiej A. Effects of COVID-19-targeted non-pharmaceutical interventions on pediatric hospital  
772 admissions in North Italian hospitals, 2017 to 2022: a quasi-experimental study interrupted time-series analysis.  
773 *Front Public Health* 2024; **12**: 1393677.
- 774 [36] LeJeune L, Ghaffarzagdegan N, Childs LM, Saucedo O. Mathematical analysis of simple behavioral epidemic  
775 models. *Math Biosci* 2024; **109250**: 109250.
- 776 [37] Ryan M, Brindal E, Roberts M, Hickson RI. A behaviour and disease transmission model: incorporating the  
777 Health Belief Model for human behaviour into a simple transmission model. *J R Soc Interface* 2024; **21**(215):  
778 20240038.
- 779 [38] Pant B, Safdar S, Santillana M, Gumel AB. Mathematical assessment of the role of human behavior changes on  
780 SARS-CoV-2 transmission dynamics in the United States. *Bull Math Biol* 2024; **86**(8): 92.

- 781 [39] De Gaetano A, Barrat A, Paolotti D. Modeling the interplay between disease spread, behaviors, and disease  
782 perception with a data-driven approach. *medRxiv* 2024; 2024-04.
- 783 [40] Osi A, Ghaffarzadegan N. Parameter estimation in behavioral epidemic models with endogenous societal risk-  
784 response. *PLoS Comput Biol* 2024; **20**(3): e1011992.
- 785 [41] Jiang M, Zhang H, Yao F, Lu Q, Sun Q, Liu Z, Li Q, Wu G. Influence of non-pharmaceutical interventions on  
786 epidemiological characteristics of *Mycoplasma pneumoniae* infection in children during and after the COVID-19  
787 epidemic in Ningbo, China. *Front Microbiol* 2024; **15**: 1405710.
- 788 [42] He Z, Zhang CJ, Huang J, Zhai J, Zhou S, Chiu JW, Sheng J, Tsang W, Akinwunmi BO, Ming WK. A new  
789 era of epidemiology: digital epidemiology for investigating the COVID-19 outbreak in China. *J Med Internet Res*  
790 2020; **22**(9): e21685.
- 791 [43] Huang Z, Zhao S, Li Z, Chen W, Zhao L, Deng L, Song B. The battle against coronavirus disease 2019 (COVID-  
792 19): emergency management and infection control in a radiology department. *J Am Coll Radiol* 2020; **17**(6):  
793 710-716.
- 794 [44] Zhong Y, Liu W, Lee TY, Zhao H, Ji J. Risk perception, knowledge, information sources and emotional states  
795 among COVID-19 patients in Wuhan, China. *Nurs Outlook* 2021; **69**(1): 13-21.
- 796 [45] Yu X, Chen S, Bingze H, Hou S, Jiang J, Luo Y, Miao H, Wang R, Wang Y, Xiang X, Tao Z, Dong Y, Woike J, King  
797 D, Colubri A. Design and Implementation of a Proximity-Based Epidemic Game for Behavioral Epidemiological  
798 Research: Methodology and Insights. In preparation.
- 799 [46] Du Z, Xu X, Wu Y, Wang L, Cowling BJ, Meyers LA. Serial interval of COVID-19 among publicly reported  
800 confirmed cases. *Emerg Infect Dis* 2020; **26**(6): 1341. doi: 10.3201/eid2606.200357.
- 801 [47] Taube JC, Miller PB, Drake JM. An open-access database of infectious disease transmission trees to explore  
802 superspreader epidemiology. *PLoS Biol* 2022; **20**(6): e3001685. doi: 10.1371/journal.pbio.3001685.
- 803 [48] Luke DA, Harris JK. Network analysis in public health: history, methods, and applications. *Annu Rev Public*  
804 *Health* 2007; **28**: 69-93.
- 805 [49] White A, Maloney E, Boehm M, Bleakley A, Langbaum J. Factors associated with COVID-19 masking behavior:  
806 an application of the Health Belief Model. *Health Educ Res* 2022; **37**(6): 452-465.
- 807 [50] Tracy CS, Rea E, Upshur RE. Public perceptions of quarantine: community-based telephone survey following an  
808 infectious disease outbreak. *BMC Public Health* 2009; **9**:(470). doi: 10.1186/1471-2458-9-470.
- 809 [51] Pritchard AJ, Silk MJ, Carrignon S, Bentley RA, Fefferman NH. How reported outbreak data can shape individual  
810 behavior in a social world. *J Public Health Policy* 2022; **43**(3): 360-378.
- 811 [52] Meloni S, Perra N, Arenas A, Gómez S, Moreno Y, Vespignani A. Modeling human mobility responses to the  
812 large-scale spreading of infectious diseases. *Sci Rep* 2011; **1**: 62.
- 813 [53] Anderson RM, May RM. Infectious diseases of humans: dynamics and control. *Oxford University Press*; 1991.
- 814 [54] Kermack WO, McKendrick AG. A contribution to the mathematical theory of epidemics. *Proc R Soc Lond A*  
815 1927; **115**(772): 700-721.
- 816 [55] Lin Q, Zhao S, Gao D, Lou Y, Yang S, Musa SS, Wang MH, Cai Y, Wang W, Yang L, He D. A conceptual  
817 model for the coronavirus disease 2019 (COVID-19) outbreak in Wuhan, China with individual reaction and  
818 governmental action. *Int J Infect Dis* 2020; **93**: 211-216.
- 819 [56] He D, Dushoff J, Day T, Ma J, Earn DJ. Inferring the causes of the three waves of the 1918 influenza pandemic  
820 in England and Wales. *Proc R Soc B* 2013; **280**(1766): 20131345.
- 821 [57] Alizad-Rahvar AR, Sadeghi M. Effect of asymptomatic transmission and emergence time on multi-strain viral  
822 disease severity. *PLoS One* 2022; **17**(10): e0269464.
- 823 [58] Gao D, Munganga JM, van den Driessche P, Zhang L. Effects of asymptomatic infections on the spatial spread  
824 of infectious diseases. *SIAM J Appl Math* 2022; **82**(3): 899-923.



- 825 [59] Bretó C, He D, Ionides EL, King AA. Time series analysis via mechanistic models. *Ann Appl Stat* 2009; **319**-348.
- 826 [60] Van den Driessche P, Watmough J. Reproduction numbers and sub-threshold endemic equilibria for compart-  
827 mental models of disease transmission. *Math Biosci* 2002; **180**(1-2): 29-48.
- 828 [61] Van den Driessche P. Reproduction numbers of infectious disease models. *Infect Dis Model* 2017; **2**(3): 288-303.
- 829 [62] Musa SS, Zhao S, Gao D, Lin Q, Chowell G, He D. Mechanistic modelling of the large-scale Lassa fever epidemics  
830 in Nigeria from 2016 to 2019. *J Theor Biol* 2020; **493**: 110209.
- 831 [63] Diekmann O, Heesterbeek JA, Metz JA. On the definition and the computation of the basic reproduction ratio  
832  $R_0$  in models for infectious diseases in heterogeneous populations. *J Math Biol* 1990; **28**(4): 365-382.
- 833 [64] Eikenberry SE, Mancuso M, Iboi E, Phan T, Eikenberry K, Kuang Y, Kostelich E, Gumel AB. To mask or not to  
834 mask: Modeling the potential for face mask use by the general public to curtail the COVID-19 pandemic. *Infect*  
835 *Dis Model* 2020; **5**: 293-308.
- 836 [65] Ngonghala CN, Iboi E, Eikenberry S, Scotch M, MacIntyre CR, Bonds MH, Gumel AB. Mathematical assessment  
837 of the impact of non-pharmaceutical interventions on curtailing the 2019 novel Coronavirus. *Math Biosci* 2020;  
838 **325**: 108364.
- 839 [66] Musa SS, Tariq A, Yuan L, Haozhen W, He D. Infection fatality rate and infection attack rate of COVID-19 in  
840 South American countries. *Infect Dis Poverty* 2022; **11**(2): 42-52.
- 841 [67] Gao D, Lou Y, He D, Porco TC, Kuang Y, Chowell G, Ruan S. Prevention and control of Zika as a mosquito-borne  
842 and sexually transmitted disease: a mathematical modeling analysis. *Sci Rep* 2016; **6**: 28070.
- 843 [68] Levine Z, Earn DJ. Face masking and COVID-19: potential effects of variation on transmission dynamics. *J R*  
844 *Soc Interface* 2022; **19**(190): 20210781.
- 845 [69] Ferguson N, Laydon D, Nedjati Gilani G, Imai N, Ainslie K, Baguelin M, Bhatia S, Boonyasiri A, Cu-  
846 cunuba Perez ZU, Cuomo-Dannenburg G, et al. Report 9: Impact of non-pharmaceutical interventions  
847 (NPIs) to reduce COVID-19 mortality and healthcare demand. *Imperial College London*. 2020. Available from:  
848 <https://spiral.imperial.ac.uk/handle/10044/1/77482>.
- 849 [70] Montag C, Becker B, Gan C. The multipurpose application WeChat: a review on recent research. *Front Psychol*  
850 2018; **9**: 2247.
- 851 [71] Wallinga J, Teunis P. Different epidemic curves for severe acute respiratory syndrome reveal similar impacts of  
852 control measures. *Am J Epidemiol* 2004; **160**(6): 509-516.
- 853 [72] Porta MS, Greenland S, Hernán M, dos Santos Silva I, Last JM, eds. A dictionary of epidemiology. *Oxford*  
854 *University Press*, 2014.
- 855 [73] Forsberg White L, Pagano M. A likelihood-based method for real-time estimation of the serial interval and  
856 reproductive number of an epidemic. *Stat Med* 2008; **27**(16): 2999-3016.
- 857 [74] Katriel G, Yaari R, Huppert A, Roll U, Stone L. Modelling the initial phase of an epidemic using incidence and  
858 infection network data: 2009 H1N1 pandemic in Israel as a case study. *J R Soc Interface* 2011; **8**(59): 856-867.
- 859 [75] Ali ST, Kadi AS, Ferguson NM. Transmission dynamics of the 2009 influenza A (H1N1) pandemic in India: the  
860 impact of holiday-related school closure. *Epidemics* 2013; **5**(4): 157-163.
- 861 [76] Fraser C. Estimating individual and household reproduction numbers in an emerging epidemic. *PLoS One* 2007;  
862 **2**(8): e758.
- 863 [77] Cori A, Ferguson NM, Fraser C, Cauchemez S. A new framework and software to estimate time-varying repro-  
864 duction numbers during epidemics. *Am J Epidemiol* 2013; **178**(9): 1505-1512.
- 865 [78] Wallinga J, Lipsitch M. How generation intervals shape the relationship between growth rates and reproductive  
866 numbers. *Proc R Soc B* 2007; **274**(1609): 599-604.



- 867 [79] Ferguson NM, Cucunubá ZM, Dorigatti I, Nedjati-Gilani GL, Donnelly CA, Basáñez MG, Nouvellet P, Lessler  
868 J. Countering the zika epidemic in Latin America. *Science* 2016; **353**(6297): 353-354.
- 869 [80] Zhao S, Musa SS, Fu H, He D, Qin J. Simple framework for real-time forecast in a data-limited situation: the  
870 Zika virus (ZIKV) outbreaks in Brazil from 2015 to 2016 as an example. *Parasites Vectors* 2019; **12**: 1-3.
- 871 [81] Zhao S, Musa SS, Hebert JT, Cao P, Ran J, Meng J, He D, Qin J. Modelling the effective reproduction number  
872 of vector-borne diseases: the yellow fever outbreak in Luanda, Angola 2015–2016 as an example. *PeerJ* 2020; **8**:  
873 e8601.
- 874 [82] Cowling BJ, Fang VJ, Riley S, Peiris JS, Leung GM. Estimation of the serial interval of influenza. *Epidemiology*  
875 2009; **20**(3): 344-347.
- 876 [83] Jiang J, Ma J. Dynamic analysis of pandemic cross-regional transmission considering quarantine strategies in the  
877 context of limited medical resources. *Appl Math Comp* 2023; **450**:127958.
- 878 [84] Epidemiological parameters in OO. Available from: <https://github.com/colabobio/oo-parameters/blob/main/derivation-of-parameters-in-oo-epi-model.pdf>. Last accessed: October 14, 2024.
- 880 [85] d’Andrea V, Gallotti R, Castaldo N, De Domenico M. Individual risk perception and empirical social structures  
881 shape the dynamics of infectious disease outbreaks. *PLOS Computational Biology*. 2022 Feb 16;18(2):e1009760.
- 882 [86] Johnson BB, Mayorga M, Kim B. Americans’ COVID-19 risk perceptions and risk perception predictors changed  
883 over time. *Journal of Risk Research*. 2023 Jul 3;26(7):815-35.

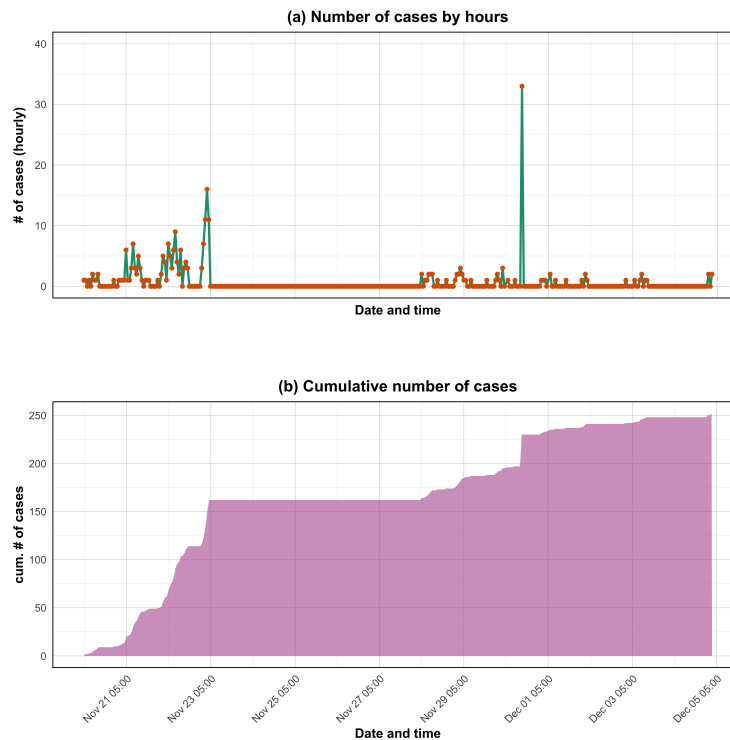

**Figure A1:** Time series plots depicting the progression of disease cases during the experiment period. The red line represents the hourly incidence data, providing a detailed view of the outbreak’s temporal dynamics. The purple line shows the cumulative number of cases, illustrating the overall growth of the outbreak over time. Specifically, panel (a) displays the hourly number of cases, capturing the short-term fluctuations in disease transmission, while panel (b) presents the daily number of cases, offering a broader perspective on the outbreak’s progression. The four-day gap without cases corresponds to a weekend and two consecutive holidays, during which participants had limited interactions, reducing potential transmissions.

## 884 Appendix

### 885 A1 Time-series of the ground-truth data

886 The raw data generated from the WKU game (see Fig. A1) provided a comprehensive overview  
887 of the outbreak dynamics and participants’ responses. This dataset included detailed contact traces  
888 for 794 participating students over a period of 14 days, capturing crucial experiment events such  
889 as infections, re-infections, individual quarantining, and disease outcomes, including recoveries and  
890 fatalities. The sheer volume of data, totaling over 2 million individual entries, offered a granular  
891 understanding of the simulated epidemic’s progression and the effectiveness of intervention strategies.

## 892 **A2 Participants' demographics, perceptions about quaran-** 893 **tine, and adoption of daily protective behaviors**

894 We administered a survey where students were able to enter their gender, major, year, mobile  
895 operating system, and other demography questions. This survey was planned to be conducted before  
896 the start of the WKU game, but due to a technical issue, this was not possible, and was distributed  
897 to participating students only several weeks after the end of the game. Because of this, only 145  
898 students responded to the survey, which is still useful to estimate the breakdown of participation  
899 among gender, year, etc. (Fig. A2). We also provided another anonymous survey to all enrolled  
900 participants that they could optionally answer before the start of the game. This survey included  
901 three questions with an answer on a scale from 1 (strongly disagree) to 5 (strongly agree): "Public  
902 health officials should have the power to order people into quarantine during COVID-19 outbreaks",  
903 "If someone is given a quarantine order by a public health official, they should follow it no matter  
904 what else is going on in their life at work or home", and "If I go into quarantine, my family, friends,  
905 and community will be protected from getting COVID-19." These questions were adapted from a  
906 telephone survey to measure public perceptions of quarantine following the H1N1 pandemic in 2009  
907 [50]. Even though these responses were not incorporated in the current analysis either, they are part  
908 of the dataset for future analyses. Furthermore, our study aimed to capture individuals' perceptions  
909 and actions undertaken by students based on the infection situation, offering insights into behavioral  
910 patterns and the efficacy of NPIs in mitigating disease transmission (Fig. A3). The daily behaviors  
911 of participants in the WKU game (using points to buy and wear a virtual mask or use antiviral to  
912 mitigate symptoms of disease, and choosing to quarantine/isolate for the day) were recorded by the  
913 app, and quantify the level of engagement of participants with the app as well as their concern with  
914 the possibility or consequences of infection. None of these data were used in the current analysis,  
915 as the time-varying transmission rate in our epidemiological model accounting for human behavioral  
916 responses was fitted to the case count data and did not use any of the explicit behavioral information  
917 collected with the app.

## 918 **A3 Superspreader epidemiology of the transmission tree in** 919 **the WKU game**

920 We followed the analyses described by Taube et al. in their 2022 paper [47], where they compiled  
921 the OutbreakTrees database containing 382 published and standardized transmission trees from  
922 16 directly transmitted diseases. For each disease, they calculated several statistics, including the  
923 dispersion parameter  $k$  and mean  $R$  of the offspring distribution (the number of infections caused  
924 by each infected individual) and the proportion of cases considered superspreaders. Their analyses  
925 showed that intermediate dispersion parameters contribute most to superspreading, and provided  
926 preliminary support for the prediction that superspreaders tend to generate more superspreaders.  
927 We applied these analyses on the largest connected component of the transmission tree from the  
928 WKU game (see Fig. A4), and we were able to reproduce all their main results from published  
929 transmission trees generated by biological pathogens: (1) significant decrease in  $R$  between the  
930 first and second halves of transmission trees with 20 or more nodes and 2 or more generations of

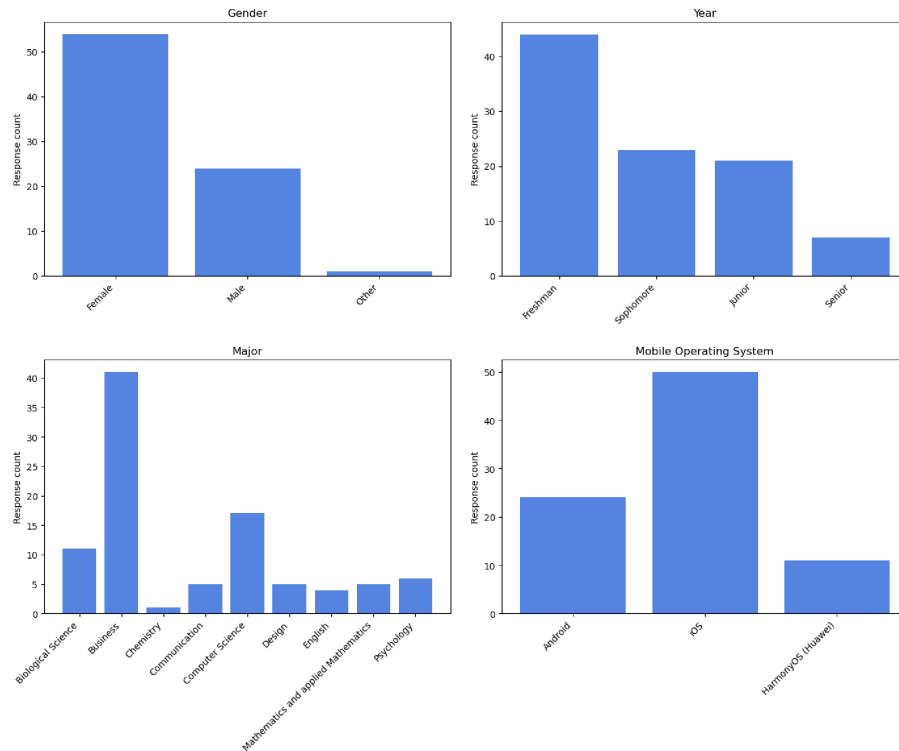

**Figure A2:** Charts representing demographics of some of the students who participated in the WKU game, collected through an anonymous survey distributed after the end of the game. These charts depict gender (female, male, other), year (freshman, sophomore, junior, senior), major (Biological Science, Business, Chemistry, Communication, Computer Science, Design, English, Mathematics and applied Mathematics, Psychology), and mobile operating system (Android, iOS, HarmonyOS/Huawei).

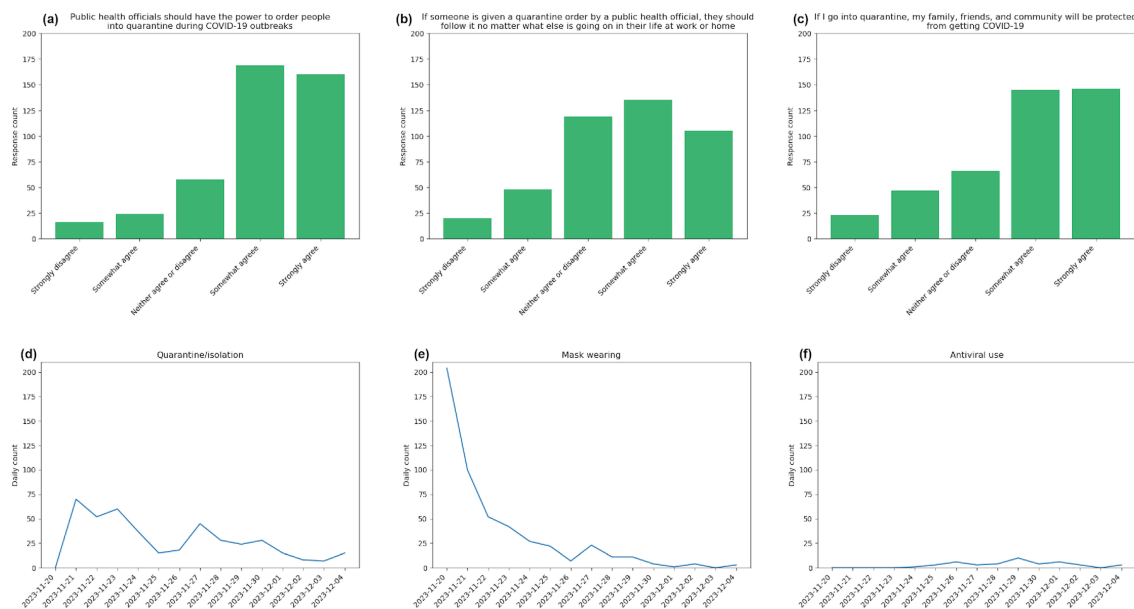

**Figure A3:** Charts depicting the perceptions of participating students regarding quarantining (top row). The height of the bars correspond to the number of students who selected each response in a scale from 1 to 5 to the three questions in the survey. The line plots show the number of students who chose to quarantine/isolate, wear a mask, and take an antiviral medication in the app at each day of the WKU game.

931 spread, (2) intermediate dispersion parameters giving rise to the highest proportion of cases causing  
 932 superspreading events, such as COVID-19 ( $k = 0.14$ ), SARS ( $k = 0.06$ ), and MERS ( $k = 0.24$ ),  
 933 with the virtual pathogen (modeled in the app after SARS-CoV-22) yield  $k = 0.35$ , and (3) and the  
 934 observed ratio of superspreader-superspreader exceeding what would be expected by chance in 12  
 935 of 18 trees, with COVID-19 trees showing ratios higher than 8 (the tree for the WKU game had a  
 936 ratio of 14 when including all nodes, and 19 when only including non-terminal nodes). These results,  
 937 even though are outside the main modeling approach we use in this paper, are very important by  
 938 providing strong evidence that that transmission dynamics in the WKU game is representative of  
 939 biologically-caused epidemic processes, and in particular close to those of SARS-like viruses.

## 940 A4 Model of disease transmission and progression in the 941 app

942 Current epidemic games using the epidemic app are driven by a customizable model of disease  
 943 transmission and progression that the app uses to calculate the probabilities of participants to move  
 944 between epidemiological (e.g.: susceptible, infectious) and health (e.g.: asymptomatic, severely sick)  
 945 states. A diagram of this model is depicted in Fig. A5). This model provides formulas for calcu-  
 946 lating the mean total duration of infection (broken down into exposed, infectious, and symptomatic  
 947 states) and how this duration can be adjusted using ratios between the different duration peri-

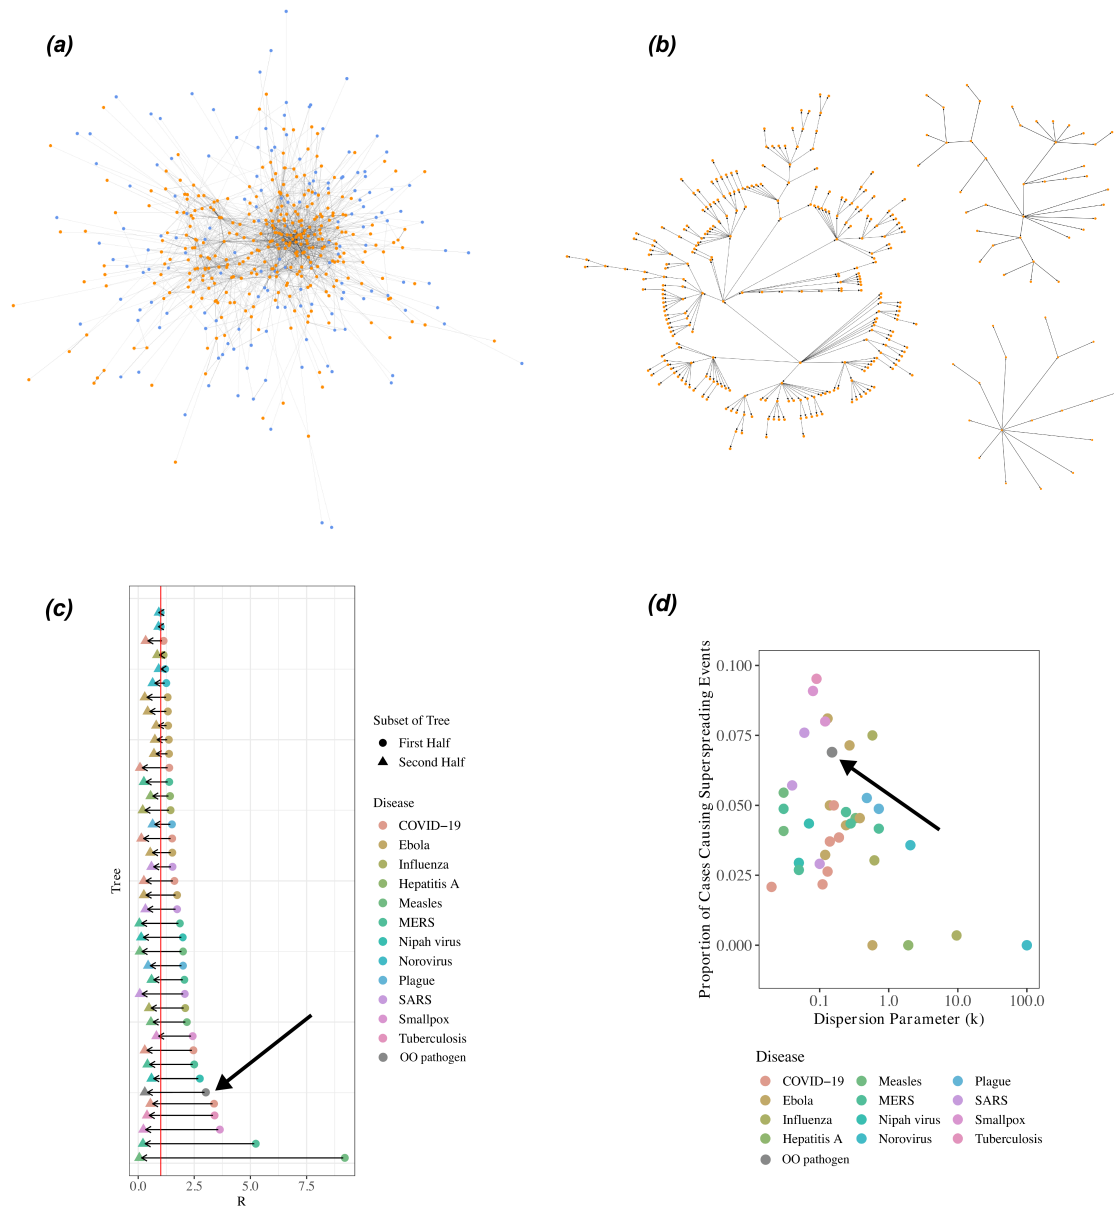

**Figure A4:** Network and superspreader epidemiology analysis of the data: contact network aggregated over the two weeks of the WKU game and colored by final infection status (blue for participants who were never infected, orange for those infected at some point during the game) (a), three largest connected transmission trees connecting infectors with infectees (b), decrease in  $R$  by disease,  $R$  was below 1 in the second half of all trees (red line denotes  $R = 1$ ) (c), and proportion of cases causing super spreading events as function of dispersion parameters, as predicted by theory and measured from the data (d). Panels (c) and (d) were adapted from [47].



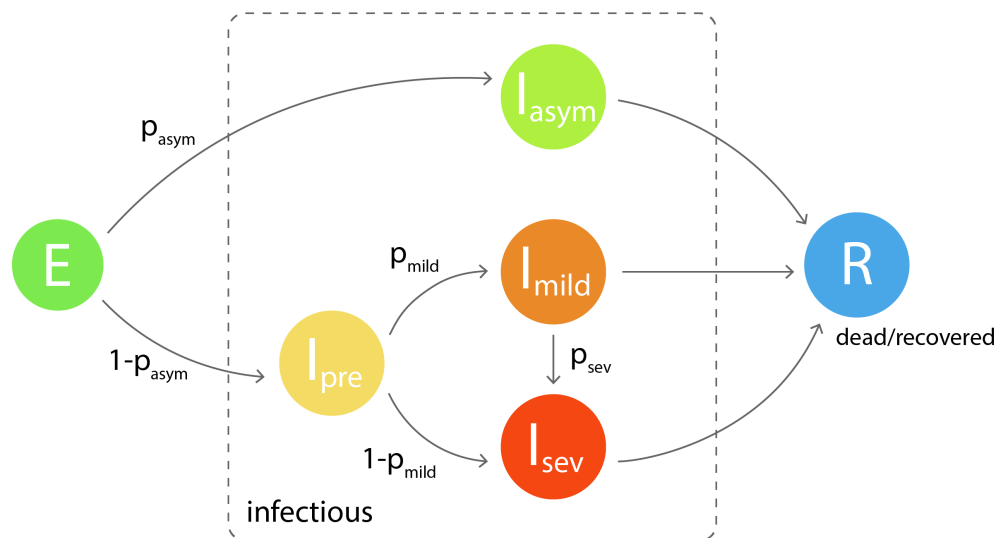

**Figure A5:** Model of disease progression in the app. "Infected" participants start in the exposed ( $E$ ) state, where they are not infectious, and from there they move on to the infectious state. The infectious state contains a sequence of possible substates depending on the symptomatology of the participants; first, the participants can become fully asymptomatic but infectious ( $I_{asym}$ ) with a probability  $p_{asym}$ . If this does not happen, with probability  $1 - p_{asym}$  the participants will turn into symptomatic, going through a pre-symptomatic state ( $I_{pre}$ ), which can evolve into symptomatic mild ( $I_{mild}$ ) or symptomatic severe ( $I_{sev}$ ) with probability  $p_{mild}$  and  $1 - p_{mild}$ , respectively. A participant in the symptomatic mild state can become severe with probability  $p_{sev}$ . From all these states,  $I_{asym}$ ,  $I_{mild}$ , and  $I_{sev}$ , the individual finally becomes removed, by either "recovering" or "dying".

948 ods to control the pace of a experiment based on real-world infection data. Given a set of mean  
 949 duration parameters, the app uses exponential distributions to randomly assign duration values dur-  
 950 ing the experiment to each participant. To determine probability of infection between susceptible  
 951 and infectious individuals, the model incorporates factors like estimated contact rate and duration  
 952 of contact, the contact detection accuracy from the Bluetooth library, and internal time-step such  
 953 that everything is normalized to that time-step for consistency. By working out the formulas in the  
 954 ground-truth transmission model in the app, it is possible to link its parameters with those in a  
 955 classical SEIR (Susceptible-Exposed-Infectious-Removed) model, such as the transmission  
 956 rate, infection period, and exposure period. This enable us to run simulated scenarios in advance  
 957 for each experimental game, and tweak the parameters in the ground-truth model so that the game  
 958 takes place within the constrains of the experimental constrains (maximum duration, anticipated  
 959 number of participants, etc.) An online reference is available detailing all the formulas used in the  
 960 model [84].

## 961 **A5 Time-varying effective reproduction number estimation** 962 **by renewal equation**

963 The transmissibility of the pathogen in the WKU game can be quantified by calculating the  
964 instantaneous (effective) reproduction number,  $R(t)$ , which represents the expected number of sec-  
965 ondary cases generated by a single infectious individual at time  $t$ . In this study, we estimated  $R(t)$   
966 from the time series data using the serial interval (SI) approach, as described by Wallinga and Teunis  
967 (2004) [71]. The SI in epidemiology refers to the time interval between successive cases in a chain  
968 of transmission [72]. With known distributions for the SI, it is possible to simulate the sequence of  
969 infections, determining the number of secondary infections caused by one primary infection based  
970 on the reproduction number. Conversely, if both the SI distribution and case time series are known,  
971 the reproduction number can be reconstructed retrospectively.

972 This approach to estimating  $R(t)$  has been extended in several studies [73, 74, 75, 76, 77, 78, 81]  
973 and has been applied to analyze the transmission dynamics of various infectious diseases [79, 80].  
974 For the WKU game, we adopted the same framework to estimate the time-varying  $R(t)$  by applying  
975 the renewal equation, expressed as Eq. (A1):

$$R(t) = \frac{x(t)}{\int_0^\infty w(k)x(t-k)dk}, \quad (\text{A1})$$

976 where  $x(t)$  represents the incidence rate at time  $t$ , and the convolution term  $\int_0^\infty w(k)x(t-k)dk$   
977 measures the total infectiousness at time  $t$ . The term  $w(k)$  refers to the distribution of the SI,  
978 which defines the period over which an individual remains infectious. This methodology allows for a  
979 detailed and dynamic estimation of the pathogen's transmissibility during the experiment.

980 Using this method, we adopted the SI estimate for COVID-19 from China as a proxy for the SI of  
981 the simulated outbreak [46]. Following approaches similar to those in [79, 80, 82, 81]. The estimated  
982 reproduction number,  $R(t)$ , for the duration of the simulation, was computed, and we provided  
983 95% confidence intervals (CI) based on Gamma priors [75, 77]. These estimates are crucial for  
984 understanding the transmission dynamics and for validating the effectiveness of non-pharmaceutical  
985 interventions (NPIs) implemented during the experiment.

986 The  $R_{eff}$  is illustrated in Fig. 3, with the gray points indicating the calculated values and the  
987 error bars representing the 95% confidence intervals. A smoothed black line captures the overall  
988 trend, providing insights into the changing transmission potential over time. The red dashed line  
989 at  $R_{eff} = 1$  marks a critical threshold: values above this indicate the infection is spreading, while  
990 values below suggest the outbreak is under control. To estimate  $R_{eff}$ , we utilized serial interval data  
991 from COVID-19 cases in China, scaled appropriately for the two-week duration of the experimental  
992 game [46]. This analysis offers a comprehensive understanding of the infection dynamics, identifying  
993 key transmission peaks and assessing the effectiveness of interventions in controlling the outbreak.

## 994 **A6 Mathematical formulation of the model**

995 Following the above description, the proposed model partitions the total population  $N(t)$  at any  
996 time  $t$  into nine distinct sub-populations: non-quarantine susceptible ( $S_{nq}(t)$ ), quarantine suscepti-

997 ble ( $S_q(t)$ ), non-isolated exposed ( $E_{ni}(t)$ ), isolated exposed ( $E_i(t)$ ), non-isolated asymptotically  
 998 infected ( $A_{ni}(t)$ ), isolated asymptotically infected ( $A_i(t)$ ), non-isolated symptomatically infected  
 999 ( $I_{ni}(t)$ ), isolated symptomatically infected ( $I_i(t)$ ), recovered ( $R(t)$ ), and deceased ( $D(t)$ ) individu-  
 1000 als. The model tracks the movement of individuals between these compartments using a system of  
 1001 non-linear ordinary differential equations (ODEs). So that:

$$N(t) = S_{nq}(t) + E_{ni}(t) + A_{ni}(t) + I_{ni}(t) + S_q(t) + E_i(t) + A_i(t) + I_i(t) + R(t).$$

1002 In the model, the rate at which individuals move between compartments is determined by various  
 1003 parameters, including the infection rate  $\lambda(t)$ , transition rates between different states ( $\sigma$ ,  $\gamma$ ,  $\tau$ ), and  
 1004 quarantine/isolation dynamics ( $\psi_{ni}(t)$ ,  $\psi_i(t)$ ). The model also includes parameters for recovery ( $\theta$ ),  
 1005 immunity waning ( $\omega$ ), and disease-induced mortality ( $\delta$ ). Individuals may leave the susceptible  
 1006 compartment ( $S_{nq}$ ) to become exposed ( $E_{ni}$ ) due to infection, or they may transition into or out  
 1007 of quarantine ( $S_q$ ) based on the rates  $\psi_{ni}(t)$  and  $\psi_i(t)$ . Once exposed, individuals may progress to  
 1008 either asymptomatic ( $A_{ni}$ ) or symptomatic infection ( $I_{ni}$ ), with similar transitions for their isolated  
 1009 counterparts ( $A_i$ ,  $I_i$ ). Recovered individuals can lose immunity and re-enter the susceptible class.  
 1010 The model further accounts for simulated "deaths" due to the disease, captured by the compartment  
 1011  $D(t)$ .

1012 The proposed model is depicted in Fig. 4; the state variables and model parameters (Table A1)  
 1013 fulfill the following system of non-linear ordinary differential equations (ODEs):

$$\begin{aligned} \frac{dS_{nq}}{dt} &= -\lambda(t)S_{nq} + \omega R + \psi_{ni}(t)S_q - \psi_i(t)S_{nq}, \\ \frac{dS_q}{dt} &= \psi_i(t)S_{nq} - \psi_{ni}(t)S_q, \\ \frac{dE_{ni}}{dt} &= \lambda(t)S_{nq} - \sigma E_{ni} + \psi_{ni}(t)E_q - \psi_q(t)E_{ni}, \\ \frac{dE_i}{dt} &= \psi_q(t)E_{ni} - \psi_{ni}(t)E_q - \sigma E_i, \\ \frac{dA_{ni}}{dt} &= \sigma E_{ni} - (\tau + \gamma)A_{ni} + \psi_{ni}(t)A_q - \psi_q(t)A_{ni}, \\ \frac{dA_i}{dt} &= \sigma E_i - (\theta + \gamma)A_i + \psi_q(t)A_{ni} - \psi_{ni}(t)A_q, \\ \frac{dI_{ni}}{dt} &= \gamma A_{ni} - (\tau + \delta)I_{ni} + \eta\psi_{ni}(t)I_q - \kappa\psi_q(t)I_{ni}, \\ \frac{dI_i}{dt} &= \gamma A_i - (\tau + \delta)I_i + \kappa\psi_q(t)I_{ni} - \eta\psi_{ni}(t)I_q, \\ \frac{dR}{dt} &= \theta A_{ni} + \theta A_i + \tau I_{ni} + \tau I_i - \omega R, \\ \frac{dD}{dt} &= \delta(I_{ni} + I_q). \end{aligned} \tag{A2}$$

1014 From model (A2), the incidence function or force of infection is given by the following equation:

$$\lambda(t) = \beta(t) \left( \frac{A_{ni} + \alpha I_{ni}}{N} \right). \tag{A3}$$

1015 It is worth mentioning that the parameter  $0 < \alpha < 1$  represents the adjustment factor for reduced  
1016 infectiousness in infectious individuals, indicating that  $A_{ni}$  is more prone to transmitting the disease  
1017 at a higher rate than  $I_{ni}$ . This is due to the silent nature of asymptomatic cases and the reduced  
1018 activity of severely infected individuals, who are less mobile within the community compared to  
1019 asymptomatic cases [57, 58]. We set the state variable  $D(t)$  to measure the number of disease-  
1020 deceased individuals to keep track of disease-related "deaths" (for calibration and quantification of  
1021 model parameters).

## 1022 Model assumptions

1023 The primary epidemiological assumptions underlying the formulation of the system (1) are as  
1024 follows:

- 1025 • **Heterogeneous mixing:** The population is heterogeneously mixed, reflecting varying contact  
1026 patterns influenced by individual behavior, risk perception, and adherence to non-pharmaceutical  
1027 interventions (NPIs). This assumption captures the complexity of real-world interactions.
- 1028 • **Exponential waiting time:** Individuals transition between epidemiological states according  
1029 to an exponential distribution, implying constant transition probabilities, simplifying the model  
1030 while maintaining analytical tractability.
- 1031 • **Continuous transitions:** Transitions between compartments occur continuously over time,  
1032 accurately representing the dynamic progression of the epidemic.
- 1033 • **Constant population size:** The total population remains constant throughout the experi-  
1034 ment, focusing exclusively on disease dynamics without accounting for participants leaving the  
1035 simulation for causes unrelated to their outcome within the experiment.
- 1036 • **Time-varying parameters:** Key parameters such as transmission and contact rates are  
1037 modeled as time-varying, reflecting adaptive behavioral responses to the evolving epidemic.
- 1038 • **Behavioral response incorporation:** Human behavioral responses, including compliance  
1039 with NPIs and changes in contact patterns, are integrated as dynamic variables, informed by  
1040 real-time data and prior studies [55, 56].
- 1041 • **Data-driven calibration:** Model calibration is based on empirical data from the WKU game,  
1042 ensuring alignment with observed transmission dynamics and enhancing predictive accuracy  
1043 [19, 21].
- 1044 • **Feedback mechanisms:** The model includes feedback loops where behavioral changes influ-  
1045 ence, and are influenced by, the disease dynamics, capturing the reciprocal relationship between  
1046 human behavior and pathogen transmission.

1047 These assumptions offer a robust framework for comprehending and modeling disease dynamics in  
1048 a controlled setting—the WKU setting in this instance—and also help us understand intervention  
1049 strategies and behavioral reactions, which offers crucial insights into containing the outbreaks.

## 1050 A7 Analysis of simplified model

1051 The simplified version of the model (depicted in Fig. A6 and formulated in (1)), which maintains  
1052 the same incidence function as in the full model (A2), while using flexible transmission rate. The  
1053 simplified version of the model (1) was modified with two additional classes: (1) “P” mimicking the  
1054 public perception of risk regarding the number of infection (severe or critical) cases; and (2) “C”  
1055 representing the number of cumulative cases. Note that it is also convenient to define the cumulative  
1056 rate of change of disease infection as  $C_{sub-model} = \sigma E + \gamma A$ . Since quarantined and isolated individuals  
1057 do not contribute to disease spread, the force of infection remains unaffected. Thus,  $\lambda(t)$  is given by  
1058  $\lambda(t) = \beta(t) \left( \frac{A_{ni} + \alpha I_{ni}}{N} \right)$ , where  $\alpha$  accounts for the reduced infectiousness.

### 1059 A7.1 Basic reproduction number

1060 Here, we computed the basic reproduction number ( $\mathcal{R}_0$ ) of the simplified model at disease-  
1061 free equilibrium (and by considering constant transmission rate  $\beta_0$ ) by adopting the next-generation  
1062 matrix (NGM) technique as demonstrated in [60]. The  $\mathcal{R}_0$  represents the number of secondary  
1063 cases that a typical primary case would cause during the infectious period in a wholly susceptible  
1064 population [60, 61, 62, 63].

1065 Through direct calculation of the NGM, we obtained  $\mathcal{R}_0$  as follows:

$$\mathcal{R}_0 = \rho(FV^{-1}) = \mathcal{R}_1 + \mathcal{R}_2 = \frac{\beta_0}{(\theta + \gamma)} + \frac{\beta_0 \alpha \gamma}{(\theta + \gamma)(\tau + \delta)}, \quad (6)$$

1066 where the parameter  $\rho$  represents the spectral radius of the next-generation matrices of the Jacobin  
1067 matrices.

1068 Therefore, the basic reproduction number,  $\mathcal{R}_0$ , can be interpreted by decomposing it into three  
1069 components as follows:  $\mathcal{R}_1$ , representing new infections from asymptotically infected contacts, and  
1070  $\mathcal{R}_2$ , representing new infections from symptomatically infected contacts. This breakdown allows for a  
1071 more nuanced understanding of how different types of infections contribute to the overall transmission  
1072 dynamics of the outbreak. Understanding  $\mathcal{R}_0$  and its components is crucial for assessing the potential  
1073 impact of an infectious disease outbreak. A high  $\mathcal{R}_0$  indicates that each infected individual is, on  
1074 average, infecting more than one other person, leading to exponential growth in cases. This highlights  
1075 the importance of interventions targeting both asymptomatic and symptomatic cases to reduce  $\mathcal{R}_0$   
1076 and control the spread of the disease effectively.

1077 The result of Theorem A7.1 below follows from Theorem 2 of [60], and reference to the local  
1078 stability of the DFE of model (1), the result of Theorem 3.1 below follows.

1079 **Theorem A7.1.** *The disease-free equilibrium of model (1) is locally-asymptotically stable whenever*  
1080  $\mathcal{R}_0 \leq 1$ .

1081 The epidemiological importance of the given theorem indicates that a small infection of the  
1082 virus would not result in a substantial epidemic if the basic reproduction number ( $R_0$ ) is lower than  
1083 one. Attaining a  $R_0$  value of less than 1 is efficacious, although not obligatory, in averting significant  
1084 epidemics. When the value of  $R_0$  is below one, the sickness naturally diminishes, but it continues to

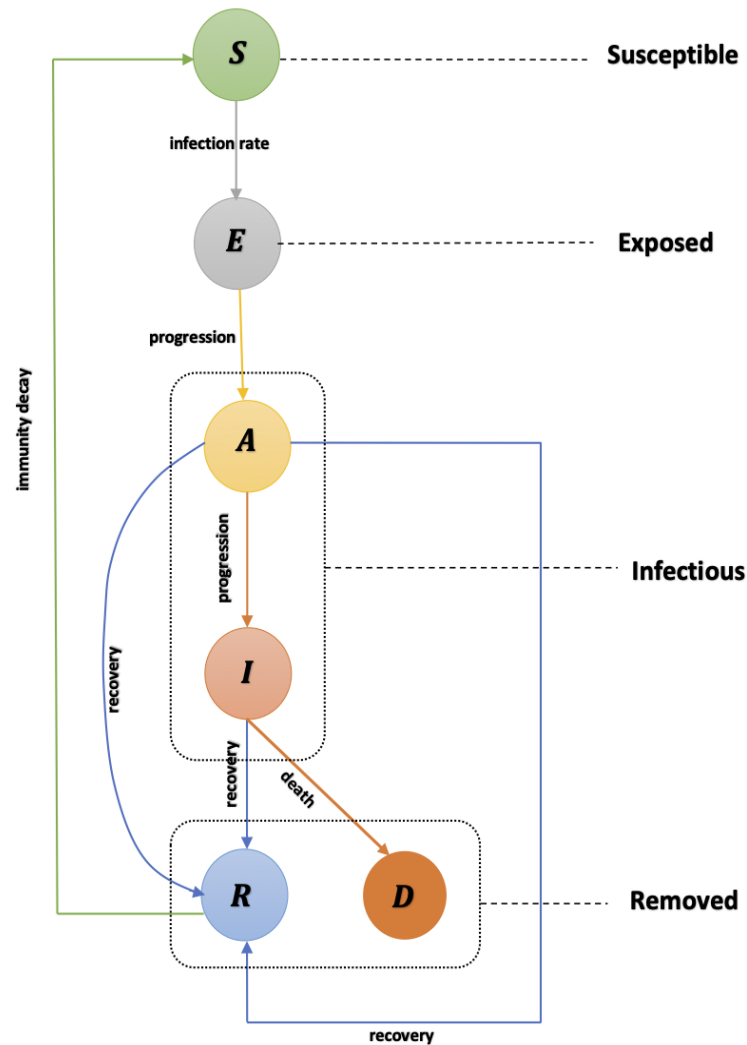

**Figure A6:** A simplified diagrammatic representation of the sub-model, derived from the full model (1), focusing on the essential dynamics of pathogen transmission. Solid arrows represent transitions between compartments, with *per capita* flow rates indicated alongside each arrow. The sub-model includes key compartments: susceptible ( $S$ ), exposed ( $E$ ), asymptomatic ( $A$ ), symptomatic ( $I$ ), and recovered ( $R$ ) individuals. This streamlined version did not consider quarantine/isolation as separate compartment but rather as a function in the transmission rate to reduce the complexity when analyzing behavioral responses, providing a clearer view of the primary transmission pathways. While simplified, this model effectively captures the core mechanisms of disease spread, making it suitable for foundational analysis and rapid simulations aimed at understanding the impact of basic intervention measures.



1085 exist when  $R_0$  is more than 1. This highlights the need for sophisticated intervention techniques to  
1086 successfully manage the disease, as demonstrated in earlier studies like [61].

## 1087 **A7.2 Model fitting and parameter estimation**

1088 In this study, we employed a compartmental SEIR model to fit the observed data on disease  
1089 transmission dynamics during the WKU game. Our fitting process utilized the simulation inference  
1090 framework, leveraging Pearson's Chi-square and the least squares method to align our model with  
1091 the data. This comprehensive approach involved conducting 10,000 random simulations to explore  
1092 the parameter space thoroughly, ensuring an accurate representation of the outbreak dynamics [64,  
1093 65, 66]. The experimental data, which captured pathogen transmission among 794 participants over  
1094 two weeks, provided a robust basis for parameter estimation. Initial conditions and demographic  
1095 parameters were derived from the experiment context. Key epidemiological parameters, such as  
1096 transmission and reinfection rates, were estimated to reflect the observed dynamics accurately. To  
1097 estimate the parameters of the model, we conducted a fitting process where parameters such as  $\beta$   
1098 (transmission rate),  $\alpha$  (modification parameter for the increase/decrease of infectiousness of infectious  
1099 individuals), and  $\omega$  (rate of reinfection) were sampled uniformly within specified ranges. This process  
1100 was iterated 1,000 times, and for each iteration, the model was solved using the lsoda function  
1101 from the deSolve package in R. The predicted number of cases ( $C_{sub-model}$ ) was compared to the  
1102 data observed in the experiment, and the fitting accuracy was evaluated using the Pearson chi-  
1103 squared statistic. The iteration yielding the lowest chi-squared value was considered the best fit.  
1104 Additionally, we computed the 95% confidence interval for the fitted model to assess the uncertainty  
1105 in the predictions. The results of our model fitting, illustrated in Fig. A7, show a close alignment  
1106 between observed cumulative incidence and model predictions, validating the model's accuracy. The  
1107 estimated parameters, detailed in Table A2, highlight the impact of human behavior and intervention  
1108 strategies on disease spread.

1109 To quantify the goodness of fit, we calculated the R-squared statistic, which represents the  
1110 proportion of variance in the observed data explained by the model. The R-squared value is computed  
1111 using the formula:

$$R^2 = 1 - \frac{SSR}{SST}$$

1112 where SSR is the sum of squares of residuals (the difference between observed and predicted values)  
1113 and SST is the total sum of squares (the difference between observed values and their mean). The  
1114 R-squared value provides an indication of how well the model captures the variability in the observed  
1115 data, with values closer to 1 indicating a better fit. In our fitting process, we achieved an R-squared  
1116 value of 0.87, suggesting that the model accurately represents the observed disease dynamics. In  
1117 the subsequent sub-section, sensitivity analyses were further assessed, which underscored the impor-  
1118 tance of timely interventions and compliance with preventive measures. These findings demonstrate  
1119 the utility of our platform in generating valuable epidemiological insights, emphasizing the role of  
1120 behavioral factors in controlling outbreaks and informing public health strategies.

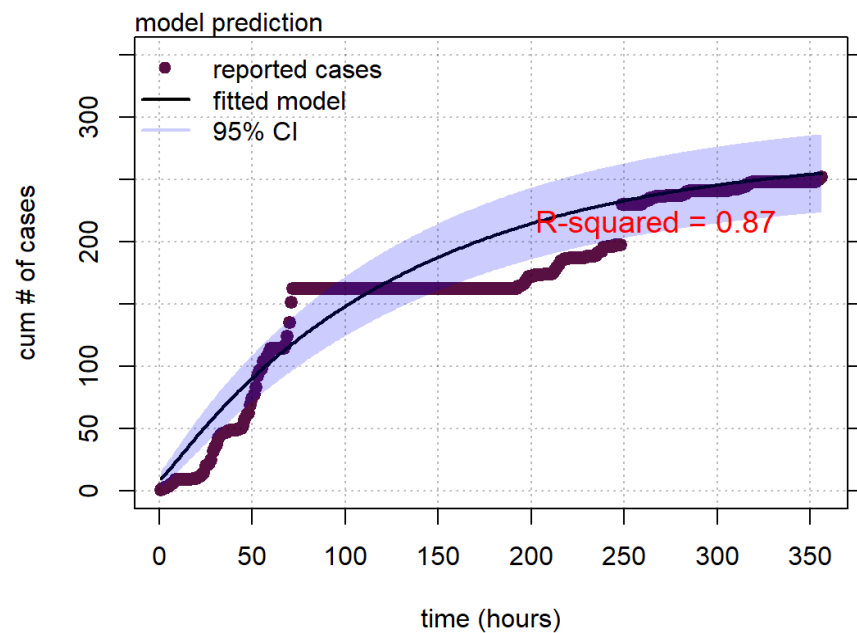

**Figure A7:** Model (6) fitting for transmission dynamics in the WKU game. The gray dotted points represent the observed data, while the red curve depicts the model's predictions based on the fitted epidemic parameters. The light-blue shaded area indicates the 95% credible interval, reflecting the model's uncertainty range. This analysis was conducted using R Statistical Software version 4.2.1. The specific parameters employed in the simulation are detailed in Table A2

### 1121 **A7.3 Further Numerical Simulations**

1122 Furthermore, we conducted further numerical simulations to gain valuable insights into how  
1123 varying key epidemiological parameters, such as transmission rate ( $\beta$ ), recovery rate ( $\theta$ ), and pro-  
1124 gression rate ( $\gamma$ ), influence the overall dynamics of disease spread. By testing 50% increases and  
1125 decreases in these parameters, we can assess their impact on infection patterns.

1126 Figures A8(a) and A8(b) illustrate the effect of varying  $\beta$  on asymptomatic ( $A_n$ ) and symp-  
1127 tomatic ( $I_n$ ) infections. In Figure 1(a), a 50% increase in  $\beta$  leads to a higher proportion of asymp-  
1128 tomatic cases over time, while a 50% decrease reduces the number of asymptomatic individuals. This  
1129 highlights the importance of minimizing transmission rates to control outbreaks. Similarly, Figure  
1130 A8(b) shows that a 50% increase in  $\beta$  results in a substantial rise in symptomatic cases, whereas  
1131 a 50% reduction significantly decreases symptomatic infections. These results emphasize the crit-  
1132 ical role of interventions aimed at reducing transmission (e.g., social distancing, mask-wearing) in  
1133 mitigating both asymptomatic and symptomatic spread.

1134 Figures A8(c) and A8(d) explore the influence of recovery ( $\theta$ ) and progression rates ( $\gamma$ ) on disease  
1135 dynamics. In Figure A8(c), increasing  $\theta$  by 50% leads to a faster reduction in asymptomatic infec-  
1136 tions, while a 50% decrease prolongs the infectious period, maintaining higher levels of transmission.  
1137 This underscores the importance of enhancing recovery rates through early detection and treatment.  
1138 In Figure A8(d), a 50% increase in  $\gamma$  accelerates the transition from asymptomatic to symptomatic  
1139 cases, increasing the overall burden of symptomatic infections. Conversely, a 50% reduction in  $\gamma$   
1140 delays the progression, reducing the number of symptomatic cases over time. This highlights the  
1141 significance of interventions that slow disease progression to alleviate the outbreak's severity. These  
1142 simulations demonstrate the profound effect that modifying  $\beta$ ,  $\theta$ , and  $\gamma$  has on controlling disease  
1143 transmission, underscoring the importance of targeted interventions in outbreak management.

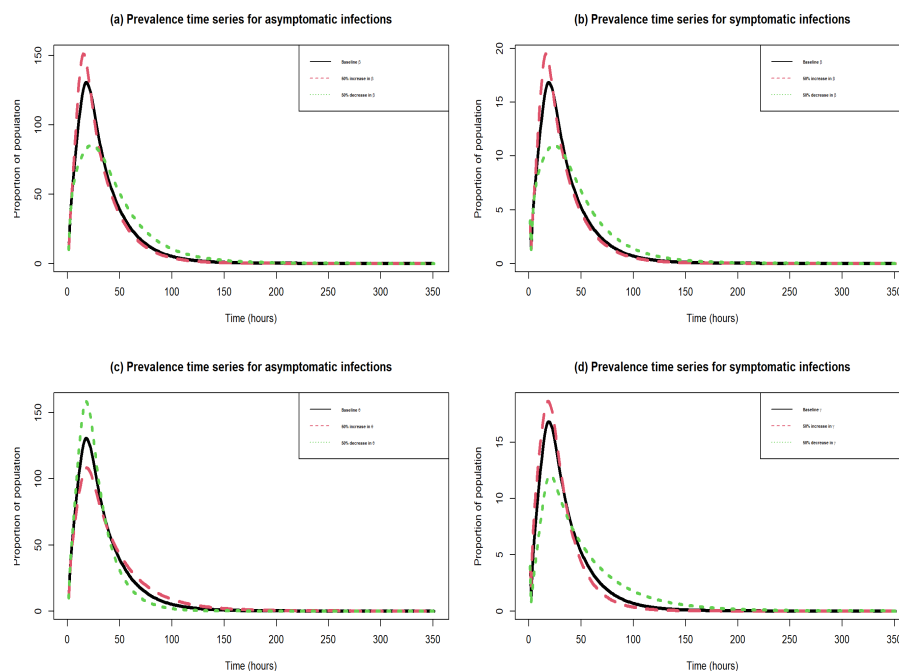

**Figure A8:** Solution curves of disease dynamics for varying transmission rates  $\beta$ , recovery rates  $\theta$ , and progression rates  $\gamma$ . (a) Prevalence time series for asymptomatic infections ( $A$ ) with varying transmission rates ( $\beta$ ). The plot shows the effect of baseline, 50% increase, and 50% decrease in  $\beta$  on the proportion of asymptomatic individuals over time. (b) Prevalence time series for symptomatic infections ( $I$ ) with varying transmission rates ( $\beta$ ). The plot illustrates how baseline, 50% increase, and 50% decrease in  $\beta$  impact the proportion of symptomatic individuals over time. (c) Prevalence time series for asymptomatic infections ( $A$ ) with varying recovery rates ( $\theta$ ). The plot shows the effect of baseline, 50% increase, and 50% decrease in  $\theta$  on the proportion of asymptomatic individuals in the population over time. (d) Prevalence time series for symptomatic infections ( $I$ ) with varying progression rates from asymptomatic to symptomatic infections ( $\gamma$ ). The plot demonstrates the effect of baseline, 50% increase, and 50% decrease in  $\gamma$  on the proportion of symptomatic individuals over time. The legends in each subplot clearly indicate the different variations in  $\beta$ ,  $\theta$ , and  $\gamma$ , highlighting the influence of these key parameters on the infection dynamics within the population.

1144 **A8 Summary table of initial state values and parameters**  
 1145 **estimation results of the model (1)**

**Table A1:** Epidemiological description of the state variables and parameters of model (1).

| <b>Variable</b>  | <b>Description</b>                                                                     |
|------------------|----------------------------------------------------------------------------------------|
| $S_n$            | Non-quarantine susceptible                                                             |
| $S_q$            | Quarantine susceptible                                                                 |
| $E_n$            | Non-isolated exposed                                                                   |
| $E_i$            | Isolated exposed                                                                       |
| $A_n$            | Non-isolated asymptomatic (mild or no symptoms)                                        |
| $A_i$            | Isolated asymptomatic                                                                  |
| $I_n$            | Non-isolated symptomatic (moderate to severe symptoms)                                 |
| $I_i$            | Isolated symptomatic                                                                   |
| $R$              | Recovered                                                                              |
| $P$              | Risk perception                                                                        |
| <b>Parameter</b> | <b>Description</b>                                                                     |
| $\beta_0$        | Probability of transmission per contact                                                |
| $\alpha$         | Modification parameters for decreased infectiousness                                   |
| $\sigma$         | Transition rate of exposed individuals to asymptotically infected                      |
| $\gamma$         | Progression rate from asymptomatic to symptoms stages                                  |
| $\psi_q$         | Rate of movement from non-quarantine/non-isolation to quarantine/isolation             |
| $\psi_n$         | Rate of movement from quarantine/isolation to non-quarantine/non-isolation             |
| $\eta$           | Rate of reduced transition from isolation to non-isolation symptomatic individuals     |
| $\kappa$         | Rate of reduced transition from non-isolation to isolation for symptomatic individuals |
| $\theta$         | Recovery rates of symptomatically infected individuals                                 |
| $\tau$           | Recovery rates of symptomatically infected individuals                                 |
| $\omega$         | Immunity waning rate                                                                   |
| $\delta$         | Disease-induced death rate                                                             |
| $\epsilon$       | Rate of intervention action strength                                                   |
| $\zeta$          | Response intensity (measures the intensity of response)                                |

**Table A2:** Summary of parameter values for model (1).

| Parameter   | Default value (range)  | Units    | Sources   |
|-------------|------------------------|----------|-----------|
| $\beta_0$   | 0.8366158 (0.25 – 1.5) | per time | fitted    |
| $\alpha$    | 0.489124 (0.4 – 0.6)   | per time | assumed   |
| $\sigma$    | 0.126 (0.01 – 0.25)    | per time | simulated |
| $\gamma$    | 0.129 (0.05 – 0.2)     | per time | simulated |
| $\psi_i$    | 0.06 (0.042 – 0.09)    | per time | [65, 68]  |
| $\psi_{ni}$ | 0.06 (0.042 – 0.09)    | per time | [65, 68]  |
| $\eta$      | 0.6333 (0.001 – 0.95)  | per time | fitted    |
| $\kappa$    | 0.084 (0.05 – 0.1)     | per time | simulated |
| $\theta$    | 0.18 (0.1 – 0.4)       | per time | [68, 65]  |
| $\tau$      | 0.017 (0.05 – 0.2)     | per time | [68, 65]  |
| $\omega$    | 0.2411152 (0.1 – 0.75) | per time | assumed   |
| $\delta$    | 0.983 (0.1 – 0.95)     | per time | assumed   |
| $m$         | 1/1.5 (0.1 – 0.92)     | per time | assumed   |
| $\epsilon$  | 0.1 (0.05 – 0.275)     | per time | simulated |
| $\zeta$     | (0.1 – 0.5)            | per time | simulated |
